# Gut-Brain Nexus: Mapping Multi-Modal Links to Neurodegeneration at Biobank Scale

## Short Title (48 characters):

Linking the Gut-Brain Axis and Neurodegeneration

## Authors:

Mohammad Shafieinouri<sup>1\*</sup>, Samantha Hong<sup>1</sup>, Artur Schuh<sup>2,3</sup>, Mary B. Makarious<sup>1,4</sup>, Rodrigo Sandon<sup>1</sup>, Paul Suhwan Lee<sup>1</sup>, Emily Simmonds<sup>5</sup>, Hirotaka Iwaki<sup>1,4</sup>, Gracelyn Hill<sup>1,4</sup>, Cornelis Blauwendraat<sup>1,6</sup>, Valentina Escott-Price<sup>5,7</sup>, Yue A. Qi<sup>1</sup>, Alastair J. Noyce<sup>8</sup>, Armando Reyes-Palomares<sup>9</sup>, Hampton L. Leonard<sup>1,4</sup>, Malu Tansey<sup>10,11</sup>, Andrew Singleton<sup>1,6</sup>, Mike A. Nalls<sup>1,4</sup>, Kristin S Levine<sup>1,4, †</sup>, Sara Bandres-Ciga<sup>1,†\*</sup>

## Affiliations:

<sup>1</sup> Center for Alzheimer's and Related Dementias, National Institutes of Health, Bethesda, MD, USA 20892.

<sup>2</sup> Departamento de Farmacologia, Universidade Federal do Rio Grande do Sul, Porto Alegre, Brazil.

<sup>3</sup> Serviço de Neurologia, Hospital de Clínicas de Porto Alegre, Porto Alegre, Brazil.

<sup>4</sup> DataTecnica LLC, Washington, DC, USA 20037.

<sup>5</sup> UK Dementia Research Institute (UK DRI) at Cardiff University, Cardiff, UK.

<sup>6</sup> Laboratory of Neurogenetics, National Institute on Aging, Bethesda, MD, USA.

<sup>7</sup> Division of Psychological Medicine and Clinical Neurosciences, School of Medicine, Cardiff University, Cardiff, UK.

<sup>8</sup> Centre for Preventive Neurology, Wolfson Institute of Population Health, Queen Mary University of London, London, UK.

<sup>9</sup> Department of Molecular Biology and Biochemistry, Faculty of Sciences, University of Málaga, Málaga, Spain.

<sup>10</sup> Department of Neuroscience, Center for Translational Research in Neurodegenerative Disease, University of Florida College of Medicine, Gainesville, FL, USA.

<sup>11</sup> Department of Neurology, Norman Fixel Institute for Neurological Diseases, University of Florida Health, Gainesville, FL, USA.

† These authors contributed equally to this work

\* Corresponding authors:

Mohammad Shafieinouri

Center for Alzheimer's and Related Dementias (CARD), NIA, NIH  
Bethesda, MD, USA 20892

Email: [mohammad.shafieinouri@nih.gov](mailto:mohammad.shafieinouri@nih.gov)

Sara Bandres-Ciga

Center for Alzheimer's and Related Dementias (CARD), NIA, NIH  
Bethesda, MD, USA 20892

Email: [sara.bandresciga@nih.gov](mailto:sara.bandresciga@nih.gov)

## Abstract:

48 Alzheimer's disease (AD) and Parkinson's disease (PD) are influenced by genetic and  
49 environmental factors. Using data from UK Biobank, SAIL Biobank, and FinnGen, we  
50 conducted an unbiased, population-scale study to: 1) Investigate how 155 endocrine,  
51 nutritional, metabolic, and digestive system disorders are associated with AD and PD risk  
52 prior to their diagnosis, considering known genetic influences; 2) Assess plasma  
53 biomarkers' specificity for AD or PD in individuals with these conditions; 3) Develop a  
54 multi-modal classification model integrating genetics, proteomics, and clinical data  
55 relevant to conditions affecting the gut-brain axis. Our findings show that certain disorders  
56 elevate AD and PD risk before AD and PD diagnosis including: insulin and non-insulin  
57 dependent diabetes mellitus, noninfective gastro-enteritis and colitis, functional intestinal  
58 disorders, and bacterial intestinal infections, among others. Polygenic risk scores revealed  
59 lower genetic predisposition to AD and PD in individuals with co-occurring disorders in  
60 the study categories, underscoring the importance of regulating the gut-brain axis to  
61 potentially prevent or delay the onset of neurodegenerative diseases. The proteomic  
62 profile of AD/PD cases was influenced by comorbid endocrine, nutritional, metabolic, and  
63 digestive systems conditions. Importantly, we developed multi-modal prediction models  
64 integrating clinical, genetic, proteomic and demographic data, the combination of which  
65 performs better than any single paradigm approach in disease classification. This work  
66 aims to illuminate the intricate interplay between various physiological factors involved in  
67 the gut-brain axis and the development of AD and PD, providing a multifactorial systemic  
68 understanding that goes beyond traditional approaches. Further, we have developed an  
69 interactive resource for the scientific community [<https://gut-brain-nexus.streamlit.app/>]  
70 where researchers can investigate components of the predictive model and can investigate  
71 feature effects on a sample level.

### 72 73 **Teaser (128 characters):**

74 Co-occurring disorders of the gut-brain axis combined with genetic and proteomic data  
75 can better predict neurodegenerative risk.  
76  
77

## 78 **MAIN TEXT**

### 79 80 **Introduction:**

81 Alzheimer's disease (AD) and Parkinson's disease (PD) are the two most common  
82 neurodegenerative disorders (1,2) and cumulatively affect over 400 million individuals  
83 worldwide (3,4). Though significant genetic risk factors for AD and PD have been  
84 identified, sporadic and late-onset forms are thought to be caused by a complex interplay  
85 between genetic (5,6) and environmental (7,8) factors. This interplay underscores the  
86 imperative to explore a multitude of variables across bodily systems to comprehend their  
87 contributions to the etiology of AD/PD (9,10).  
88

89 Increasingly, research in neurodegeneration emphasizes the role of gut-brain axis health in  
90 neurodegeneration risk (11,12). The gut-brain axis is a complex communication network  
91 that links the gastrointestinal tract and the central nervous system. This bidirectional  
92 system, including neural pathways, hormonal signaling, and immune mechanisms,

93 facilitates constant interactions between the brain, digestive, endocrine, metabolic systems  
94 and nutritional status. Conditions that impact the gut-brain axis include digestive system  
95 disorders (13), endocrine pathway disorders (14,15), nutritional deficiencies (16,17), and  
96 metabolic traits (18).

97  
98 Endocrine disorders, such as thyroid hormone imbalances, have been linked to AD and PD  
99 (15,19), with conditions like hypothyroidism and subclinical hyperthyroidism being  
100 associated with dementia risk (20) and both hypo- and hyperthyroidism being associated  
101 with increasing PD risk (15). Metabolic disorders, particularly diabetes, are also related to  
102 neurodegenerative disease risk. An increased severity of diabetes is associated with a  
103 higher risk of PD (21,22) and type 2 diabetes is a recognized risk factor for AD (23).  
104 Consequently, antidiabetic medications are being explored as potential treatments for AD  
105 and PD (24). Additionally, nutritional deficiencies such as low vitamin D levels are more  
106 prevalent in AD and PD patients (25). Digestive disorders have been observed to precede  
107 PD (26) or be significantly associated with an increased risk for dementia (27). These are  
108 just a few examples of factors contributing to the gut-brain axis health and their influence  
109 on neurodegeneration.

110  
111 Understanding the connection between disorders of the gut-brain axis and  
112 neurodegeneration can provide useful insights into therapeutic interventions, with major  
113 implications for prevention and disease prognosis. In this study, we perform a large  
114 biobank-scale characterization of the impact that disorders affecting the gut-brain axis and  
115 related to endocrine, nutritional, metabolic, and digestive systems have on the risk of AD  
116 and PD. Utilizing data from the UK Biobank, SAIL, and FinnGen, we conducted a  
117 population-scale, unbiased assessment that aimed to: 1) Investigate the association  
118 between 155 diagnoses related to endocrine, nutritional, metabolic, and digestive system  
119 disorders and the risk of AD and PD, while also accounting for established genetic factors  
120 known to influence the development of these conditions; 2) Evaluate the specificity of  
121 plasma biomarkers associated with AD or PD when individuals have these co-occurring  
122 conditions; 3) Develop a multi-modal classification model combining all these data  
123 modalities; 4) Analyze the interpretability of ML models and deploy an open-access cloud  
124 platform to ensure reproducibility and transparency.

## 128 Results:

### 129 **A prior diagnosis of certain endocrine, nutritional, metabolic, and digestive system** 130 **related disorders is associated with increased risk for Alzheimer's disease and** 131 **Parkinson's disease**

132 Cox regression models unraveled a total of 16 ICD-10 diagnoses to be significantly  
133 associated with the risk of AD (table S1 and fig. S1) in the UKB after correction for  
134 multiple comparisons (discovery cohort) that were also found to be significant in either  
135 SAIL, FinnGen biobanks, or both (Table 1). A diagnosis of hemorrhoids and perianal  
136 venous thrombosis was found to have a  $HR < 1$  for AD in all three datasets. This  
137 observation could potentially be due to the fact that a hospitalized diagnosis of  
138 hemorrhoids and perianal venous thrombosis could be an indication of other, more serious  
139 conditions linked to a high mortality rate, thus explaining the protective observed effect  
140 (28). The 15 other ICD-10 codes that were found to be significant have a  $HR > 1$ ,

141 suggesting that being diagnosed with these conditions increases the risk for AD; these  
142 include amyloidosis; diseases of pulp and periapical tissues; disorders of lipoprotein  
143 metabolism and other lipidemias; disorders of mineral metabolism; gastritis and  
144 duodenitis; insulin-dependent, non-insulin-dependent, and unspecified diabetes mellitus;  
145 oesophagitis; other bacterial intestinal infections; other disorders of fluid, electrolyte and  
146 acid-base balance; other functional intestinal disorders; other noninfective gastro-enteritis  
147 and colitis; and volume depletion.

148  
149 Of note, our analyses indicate significant associations between 7 disorders and the risk for  
150 PD (table S2 and fig. S2) that were replicated in either SAIL or FinnGen biobanks (Table  
151 2). For PD, diverticular disease of the intestine, other diseases of the intestine, and other  
152 disorders of the peritoneum have  $HR < 1$  replicated in two datasets. Similarly to AD,  
153 individuals diagnosed with these conditions are not representative of the entire population  
154 due to the severity of these conditions and differential survival rates (29–32). The other 7  
155 ICD-10 codes that had a  $HR > 1$  include dyspepsia; insulin-dependent and non-insulin-  
156 dependent diabetes mellitus; and other functional intestinal disorders.

157  
158 Additionally, we conducted a time-stratified cox regression analysis to evaluate whether  
159 the timing of diagnosis for the ICD-10 codes under study impacts HR values for AD or  
160 PD. We split the samples from UKB into three strata: 1-5 years, 5-10 years, and 10-15  
161 years prior to AD/PD diagnosis. We then re-evaluated the HRs for AD and PD for the  
162 significant ICD-10 codes identified in the previous analysis (Table 3 and Table 4). The  
163 values and directions of the HRs in the stratified analysis show that the risk associated  
164 with each ICD-10 code is consistent across the three strata.

### 165 **Survival analysis indicates increased Alzheimer's disease and Parkinson's disease** 166 **incidence in individuals with significant diagnosis of endocrine, nutritional,** 167 **metabolic, and digestive system related disorders**

168 Using UKB data, we conducted survival analyses to explore the probabilities of an AD  
169 and PD diagnosis at a certain time interval. We generated Kaplan-Meier plots for the  
170 significantly associated ICD-10 codes as depicted in fig. S3 and fig. S4, respectively. At  
171 the beginning of the observation period, the survival probability starts at 1.0, indicating  
172 that all individuals diagnosed with an ICD-10 code are initially free from AD and PD.  
173 Over time, this probability diminishes as more individuals are diagnosed with AD or PD.  
174 The curves demonstrate the impact of specific ICD-10 code diagnosis on the likelihood of  
175 developing these neurodegenerative diseases. Notably, individuals with the significantly  
176 associated ICD-10 code diagnoses exhibited a higher incidence of AD and PD.

### 177 178 179 **Genetic susceptibility for Alzheimer's disease and Parkinson's disease is higher in** 180 **isolated cases compared to those with co-occurring endocrine, nutritional, metabolic,** 181 **and digestive disorders**

182 We compared the distribution of PRS in individuals diagnosed only with AD or PD versus  
183 those having concurrent AD/PD and any ICD-10 code diagnosis under study for samples  
184 from UKB only. Of note, some significant ICD-10 codes associated with AD included  
185 those pertaining to diabetes mellitus; other disorders of fluid, electrolyte, and acid-base  
186 balance; and obesity. Similarly, there were significant associations between diabetes  
187 mellitus, disorders of the peritoneum, and vitamin B group deficiencies, and PD. A  
188 comprehensive summary of these results is shown in fig. S5 and fig. S6.  
189

190 For all significant t-tests, a lower average PRS was observed in individuals with co-  
191 occurring AD and another condition compared to individuals with only AD. For instance,  
192 in AD patients with a non-insulin-dependent diabetes mellitus diagnosis, our analysis  
193 revealed lower average PRS scores compared to individuals with only AD, either  
194 including or excluding APOE (t-test = -4.26, P = 2.3e-5 and t-test = -2.88, P = 4.01e-3,  
195 respectively). Similar trends were observed in individuals with AD and other bacterial  
196 intestinal infections (including APOE t-test = -2.31, P = 2.24e-02; excluding APOE t-test  
197 = -2.26, P = 2.54e-02), other disorders of pancreatic internal secretion (including APOE t-  
198 test = -2.17, P = 3.12e-02), oesophagitis (including APOE t-test = -3.08, P = 2.33e-02;  
199 excluding APOE t-test = -2.39, P = 1.78e-02), as well as gastritis and duodenitis  
200 (including APOE t-test = -2.83, P = 4.76e-03).

201  
202 Of note, lower average PRS was observed for all significant t-tests in individuals with co-  
203 occurring PD and another condition compared to individuals with only PD. For instance,  
204 PD patients with other disorders of the peritoneum had a lower average PRS score than  
205 those with only PD (t-test = -3.00, P = 3.70e-03). Additionally, individuals with PD and  
206 other functional intestinal disorders (t-test = -2.08, P = 3.80e-02), insulin-dependent  
207 diabetes (t-test = -2.55, P = 1.29e-02), non-insulin dependent diabetes (t-test = -3.68, P =  
208 2.52e-4), or a deficiency of other B group vitamins (t-test = -2.54, P = 1.23e-02) also had  
209 lower average PRS scores than individuals with only PD.

210  
211 This result must be interpreted with caution, as there is potential for collider bias in our  
212 analysis. By selecting individuals with AD/PD, we are conditioning on these disorders,  
213 which are influenced by both the PRS for AD/PD and other risk factors, such as co-  
214 occurring endocrine, nutritional, metabolic, and digestive disorders. This conditioning can  
215 induce a spurious association between the PRS for AD/PD and these other risk factors,  
216 leading to the appearance of a lower average PRS in the group with AD/PD and co-  
217 occurring disorders. Essentially, this bias might make it seem as though lower genetic risk  
218 is linked to AD/PD in the presence of ICD-10 diagnoses, when in fact the relationship  
219 may be driven by the complex interplay of risk factors.

### 220 221 **The interplay between AD and PD cumulative known genetic effects and the risk for** 222 **endocrine, nutritional, metabolic, and digestive systems disorders did not display any** 223 **synergistic impact**

224 We did not identify significant synergistic interaction terms at a nominal P<0.05 and  
225 exhibiting an OR>1 in either AD (see table S3 and table S4) or PD (see table S5). This  
226 suggests that the combined occurrence of endocrine, nutritional, metabolic, or digestive  
227 system related disorders does not lead to a synergic effect on AD/PD risk that surpasses  
228 the sum of their individual impacts.

### 229 230 **The proteomic profile of individuals diagnosed with Alzheimer's disease and** 231 **Parkinson's disease is influenced by comorbid endocrine, nutritional, metabolic, and** 232 **digestive systems conditions**

233 Our analysis showed 22 proteomic biomarkers with notable differences in AD cases  
234 versus controls, alongside 156 proteins exhibiting significant distinctions in PD cases  
235 compared to controls after controlling for multiple comparisons (table S6 and table S7,  
236 respectively). We delved deeper into the levels of proteomic biomarkers, applying a t-test  
237 to juxtapose average levels between standalone cases of AD/PD and cases co-occurring  
238 with specific ICD-10 codes. After implementing FDR corrections, we found significant  
239 differences in proteomic biomarker levels in individuals with only AD/PD compared to



240 individuals with AD/PD and co-occurring ICD-10 conditions. Specifically, we observed  
241 that 37 biomarkers displayed increased levels in AD cases with co-occurring ICD-10  
242 diagnosis compared to isolated AD cases (Table 5), while a total of five biomarkers  
243 demonstrated significant elevated levels in PD cases with accompanying conditions  
244 compared to standalone PD cases (Table 6). These findings hint at distinct associations  
245 between specific biomarkers and AD/PD, while others may be influenced by concurrent  
246 comorbidities.

### 247 **Multi omics integration models based on clinical, genetic, and proteomic data** 248 **improve accuracy to predict Alzheimer’s disease and Parkinson’s disease risk versus** 249 **a single paradigm** 250

251 In our analysis, the combination of genetic, clinical, proteomic (controlling for multiple  
252 comparisons using Bonferroni correction), and demographic factors (including age at  
253 recruitment and gender) exhibited superior predictive performance for AD risk when  
254 compared to the individual data sets, with a test AUC of 0.9 [95% CI 0.88-0.92] and test  
255 balanced accuracy (BA) of 0.83 [0.80-0.86]. Curiously, the model combining genetic,  
256 proteomic, and demographic features (i.e. no clinical information) had a very similar test  
257 AUC of 0.89 [0.87-0.91] and a test BA of 0.82 [0.78-0.86], suggesting that the risk  
258 information captured by clinical features may be encompassed within the information  
259 provided by genetic, proteomic, and demographic features. The best classifier using only  
260 one data attribute was the model that used only proteomic data for prediction with a test  
261 AUC of 0.87 [0.85-0.89] and test BA of 0.79 [0.76-0.82]. The performance of each  
262 predictive model is shown in fig. 1 and the metrics are listed in table S8.

263  
264 For PD, the integration of genetic, proteomic and demographic factors showcased  
265 heightened predictive efficacy with a test AUC of 0.78 [0.74-0.82] and test BA of 0.70  
266 [0.68-0.72]. For PD, addition of the clinical data did not improve the AUC and test BA of  
267 the model. Clinical features do not contain any useful information and predicting solely on  
268 clinical features perform no better than a random classifier, with a test AUC of 0.52 [0.49-  
269 0.55]. The best classifier using only one data attribute was the model that used  
270 demographics data (Age at recruitment, Sex, and Townsend\_deprivation\_index), with a  
271 test AUC of 0.77 [0.74-0.80] and a test BA of 0.72 [0.68-.76]. The performance of each  
272 model for PD is shown in fig. 2 and table S9.

273  
274 SHAP values provide an in-depth analysis of machine learning classifiers by highlighting  
275 the top discriminating features of AD/PD compared to healthy controls. The biological  
276 plausibility of the models is supported by feature importance plots, which emphasize  
277 known risk factors for AD and PD, such as age and PRS. Among the proteomic features,  
278 neurofilament light polypeptide (NLF) emerges as a significant factor for both AD and  
279 PD, suggesting its potential as a biomarker for multiple forms of neurodegeneration. In  
280 AD, other top features include glial fibrillary acidic protein (GFAP) and growth  
281 differentiation factor (GDF) from proteomics data. From clinical features, only gastritis  
282 and duodenitis appear among top features (fig. 3A). Proteomic factors, including  
283 Adhesion G-protein coupled receptor G2 and Integrin alpha-M and Interleukin receptor,  
284 help distinguish PD from controls (fig. 3B). The interactive website (<https://gut-brain-nexus.streamlit.app/>)  
285 was developed as an open-access and cloud-based platform for  
286 researchers to investigate the top features of the machine learning models developed and  
287 how these may influence the AD/PD risk scores. Finally, the screenshots of our cloud-  
288 based interpretability analysis and multimodal prediction tool are shown in fig. S7-S10.  
289

290  
291

## 292 Discussion:

293 With the increasing prevalence of AD (33) and PD (34), it is imperative to enhance our  
294 understanding of the determinants that increase the risk for these common  
295 neurodegenerative diseases and most importantly, develop improved prediction models for  
296 early detection. Here, we have undertaken the most extensive biobank-scale omics study  
297 to date to assess the influence of main biological system disorders implicated in the gut-  
298 brain axis (including endocrine, nutritional, metabolic, and digestive-related conditions)  
299 preceding the diagnosis of AD and PD. The culmination of which is a multi-modal  
300 classification model that combines clinical, genetics, and proteomics data enhancing the  
301 prediction accuracy of AD and PD.

302  
303 In a large-scale and data driven manner, we demonstrate that certain endocrine,  
304 nutritional, metabolic, and digestive system related disorders are significantly associated  
305 with an increased risk of AD and/or PD prior to diagnosis. Of note, individuals with other  
306 non-infective gastroenteritis and colitis; oesophagitis; gastritis and duodenitis; disorders of  
307 fluid, electrolyte, and acid-base balance; pancreatic internal secretion disorders; and other  
308 functional intestinal disorders showed a higher likelihood of developing AD later in life.  
309 Recent literature has suggested the amplification of AD risk from disorders affecting the  
310 gut-brain axis, such as gastritis (35). Our results corroborate these findings and reveal  
311 additional, novel potential disorders of interest for further study, with replication across  
312 multiple datasets. In regards to PD, significant diagnoses associated with increased PD  
313 risk include other functional intestinal disorders, disorders of pancreatic internal secretion,  
314 and deficiency of other B group vitamins. The correlation between the deficiency of other  
315 B group vitamins and PD expands upon previous studies that have looked at other vitamin  
316 deficiencies, such as vitamin D (25), and warrants more research on the impact of  
317 nutritional deficiencies on neurodegenerative diseases.

318  
319 Our study robustly demonstrates that the probability of developing AD/PD increases with  
320 certain co-occurring endocrine, metabolic, digestive, or nutritional conditions,  
321 corroborating the hypothesis that a diagnosis affecting the gut-brain axis elevates the risk  
322 of AD/PD. We also show that risk of neurodegeneration persists up to 15 years before  
323 AD/PD onset with a co-occurring diagnosis of an endocrine, metabolic, digestive or  
324 nutritional disorder or trait. For example, having a diagnosis of other functional intestinal  
325 disorders results in an increased HR for both AD and PD in the periods 1-5, 5-10, and 10-  
326 15 years prior to AD/PD diagnosis.

327  
328 In an effort to investigate genetic distinctions and potential etiological subtypes of AD and  
329 PD, we compared polygenic risk for AD and PD in individuals diagnosed only with AD or  
330 PD and individuals with AD or PD co-occurring with other endocrine, nutritional,  
331 metabolic, and digestive-related disorders. Of note, our study confirmed that individuals  
332 diagnosed with any type of diabetes mellitus in addition to AD or PD are shown to have a  
333 significant different PRS than individuals with AD or PD alone, in concordance with  
334 previous studies showing that diabetes is a risk factor for both AD and PD (36–38). For  
335 both AD and PD, comorbidity with any of the significant disorders affecting the gut-brain  
336 axis showed lower average PRS scores compared to those with only AD or PD. Our  
337 findings suggest that systemic health risk factors can more prominently account for one's

338 disease risk in the absence of other genetic risk factors in patients with AD or PD,  
339 highlighting the importance of considering both genetic as well as other health factors in  
340 assessing the overall risk of developing AD and PD. Using diabetes as a positive control  
341 in our study, we found that individuals diagnosed with AD along with another disorder  
342 affecting the gut-brain axis, such as other bacterial intestinal infections and other  
343 functional intestinal disorders, result in a significantly lower average PRS score compared  
344 to individuals with only AD. This suggests that severe digestive conditions such as  
345 infections affecting the gut microbiome, independent of genetic risk, could increase the  
346 risk for AD as previously described (39). For PD, there existed a significant difference in  
347 PRS in individuals without vs. with other functional intestinal disorders and other  
348 disorders of the peritoneum, in concordance with previous studies suggesting an influence  
349 of disorders involving the gut-brain axis on PD (40).

350  
351 In addition, our analysis revealed that the relationship between the genetic risk for AD/PD  
352 and many disorders of the endocrine, nutritional, metabolic and digestive systems resulted  
353 in a combined impact not significantly greater than the sum of their individual effects.  
354 These interactions are not synergistic, confirming the notion that known genetic risk  
355 factors included in the models under study for both AD and PD are independent from  
356 gastrointestinal and metabolic disorders, which highlights the importance of  
357 environmental factors in the development of both AD and PD. While both genetic and  
358 systemic health disorders independently influence the risk of AD and PD, many disorders  
359 may not interact in a way that significantly amplifies this risk when combined.

360  
361 Through our exploration of proteomics and AD/PD risk, we identified several promising  
362 candidates for AD/PD diagnosis. For instance, we found that for AD, the proteomic  
363 biomarker with the largest impact on disease was glial fibrillary acidic protein (GFAP),  
364 supporting previous literature findings that GFAP can serve as an indicator of AD  
365 pathology (41). However, the levels of GFAP were significantly decreased in samples  
366 with AD and a co-occurring ICD-10 code for gastritis and duodenitis or non-insulin  
367 dependent diabetes mellitus. For PD, in concordance with previous studies, we identified  
368 peroxiredoxin 1 (PRDX1) as a potential biomarker for disease (42). Again, the levels of  
369 PRDX1 were significantly decreased in PD cases and a coinciding ICD-10 code for  
370 insulin-dependent diabetes mellitus. These differences in biomarker levels between  
371 samples solely with AD/PD vs. samples with additional diagnoses highlight the influence  
372 of comorbidities on disease manifestation. Although longitudinal research would need to  
373 be conducted, our findings suggest that these biomarkers could serve as valuable  
374 diagnostic or prognostic tools for AD and PD, potentially enhancing early detection and  
375 disease management.

376  
377 The inclusion of multiple features, integrating clinical data on digestive, endocrine,  
378 nutritional and metabolic disorders, genetic risk scores, and proteomic data in our  
379 prediction model, demonstrated superior performance in predicting both AD and PD  
380 compared to single-variable paradigms. Co-occurring diagnosis for conditions influencing  
381 the gut-brain axis do not seem to influence the predictability of neither AD nor PD as  
382 much as the other variables (demographic factors, biomarkers, and genetic status), but the  
383 fact that for both AD and PD the combination of data (clinical, genetic, proteomic, and  
384 demographic) produces a higher AUC for the ROC curve compared to single modalities  
385 underscores the value in including multiple facets of data in predictive models. Overall,  
386 these results from our models reveal the promising predictive capabilities of our  
387 constructed multi-modal classification models in identifying individuals at risk for



AD/PD. The study suggests that the selected proteomic biomarkers, when combined with genetic and other demographic and clinical variables, serve as robust predictors. These predictors have the potential to significantly enhance prediction diagnostic accuracy for AD/PD. In addition, neurofilament light polypeptide proteomic feature stands out as a key factor for both AD and PD, indicating its potential as a biomarker for various forms of neurodegeneration. Our approach highlights the potential clinical utility of multi-omics in enhancing diagnostic accuracy, and further emphasizes the importance of considering other bodily systems when predicting the risk underlying neurodegenerative diseases.

Transparency and reproducibility are critical aspects of science. This becomes even more important for machine learning models due to their dependency on data and the black-box nature of these models. To facilitate this, we made two contributions: (1) Model interpretability analysis, using SHAP values to identify the top features, corresponding to each modality, that can be validated against existing biological findings; (2) Development of an open-access, cloud-based platform for researchers to explore the model developed in this study and investigate how different factors may influence the classification (or, in some cases, misclassification) of a particular sample. Additionally, we incorporated a model perturbation analysis feature on our website, allowing researchers to manually adjust features and observe the resulting changes. These efforts enhance transparency and move the research community away from black-box predictors through interpretable modeling.

Some overall limitations of our work include the use of solely ICD-10 codes for diagnosis, and not other additional assays, which may overlook undiagnosed cases, leading to a potential underestimation of the true impact of these disorders on AD/PD risk. Across datasets, the available diagnosis codes also differ causing further limitations in comparison and validation. Because individuals with AD often present with different cognitive, behavioral, and pathological features, diagnosis of AD is often difficult and inconsistent (43). Though we use the ICD-10 code to filter for AD in this study, it is possible for AD to be interchanged with dementia as diagnosing AD is difficult. The sample makeup across data sources can also be different. Since the UKB participants are volunteers who may have agreed to participate before reaching old age, the incidence of AD/PD may be different compared to the SAIL and FinnGen datasets. The cross-sectional nature of the data used to study biomarker associations may limit any causal inference. The SAIL and FinnGen datasets do not include proteomic data, preventing us from further validating our modeling efforts. The focus on samples of European ancestry constrains the generalizability of our findings to other populations from other genetic backgrounds. Future work needs to be done across different ancestral backgrounds to be globally representative.

Our study delves into the intricate interactions between clinical, genetic and proteomic data, culminating in the construction of a comprehensive multi-modal classification model. This pioneering endeavor aims to shed light on the nuanced interplay between various physiological factors playing a role on the gut-brain axis and the development of AD and PD, offering a multifactorial systemic understanding that transcends traditional approaches. Our integrated approach serves as a proof of concept, aligning with the expanding body of evidence that underscores the intricate etiological foundations of neurodegenerative diseases and holds promise for refining risk prediction models and devising targeted preventive strategies. Further, we have developed an interactive resource for the scientific community [<https://gut-brain-nexus.streamlit.app/>]. This, in turn, propels

our endeavors in elucidating clinical interventions aimed at addressing these debilitating conditions.

## Materials and Methods:

This study utilizes data from three biobanks: the UK Biobank (UKB), FinnGen, and the Secure Anonymized Information Linkage (SAIL) (See fig. 4 for an workflow rationale of this study).

### UK Biobank

The UKB data, accessed via DNAnexus under application number 33601, includes electronic health records of approximately 502,367 individuals, single nucleotide polymorphism (SNP) data of 487,279 individuals, and proteomic (Olink) data of 52,705 individuals (<https://ukbiobank.dnanexus.com>) (accessed on May 2023). The control group for the UKB dataset consisted of a subset of 352,610 individuals who have not been diagnosed with any neurodegenerative disease condition (table S10) and have no family history AD and PD diagnosis. For our approach, related individuals were filtered out from further analyses based on a kinship coefficient greater than 0.0884, and only individuals of European descent were selected for this study, based on field ID 22006, who self-identified as 'White British' and confirmed through principal component (PC) analysis of the genotyping data to avoid potential confounding effects. We lacked a sufficient number of individuals with non-European ancestry to conduct a meaningful assessment. Our final dataset included 409,520 individuals of European ancestry. Endocrine, nutritional, metabolic, and digestive disorders, as well as AD and PD diagnosis, were derived from ICD-10 (International Classification of Diseases, 10th Revision) codes. The AD cohort was obtained from the G30 and F00 ICD-10 codes in the UKB, and the PD cohort was obtained from the G20 ICD-10 code. We excluded any individuals who had received an ICD-10 diagnosis for endocrine, nutritional, metabolic, and digestive disorders before January 1st, 1999, and right-censored any individuals who received an ICD-10 diagnosis after being diagnosed with AD or PD. Furthermore, any ICD-10 code with fewer than 5 cases was excluded from the analysis. Demographic characteristics are shown in table S11.

### SAIL Databank

The Secure Anonymised Information Linkage (SAIL) databank is a virtual platform providing anonymized medical data of the population in Wales (44). Diagnoses in SAIL are sourced from the Patient Episode Database for Wales (PEDW), records from clinicians and hospital staff, the Welsh Longitudinal General Practitioner dataset (WLGP), records from primary care physicians of diagnoses, treatments, symptoms, and referrals. Demographic information such as sex, age, address, and death were obtained from the Welsh Demographic Services Database (WDSD) and WLGP. Individuals with missing age or sex data and those without a Welsh address were excluded from further analysis.

486 Diagnoses were identified in the PEDW using ICD-10 codes and in the WLGP using NHS  
487 read codes (CVT2,3). Neurodegenerative disorders from the outpatient data (OPDW) were  
488 excluded due to their minimal representation of dementia cases (only 0.1%) and the  
489 absence of reliable diagnosis dates. Similarly, dementia diagnoses from death records  
490 (ADDES) were not included due to inaccurate diagnosis dates. This study covered the  
491 period from January 1, 1999, to December 31, 2018. For inclusion, individuals were  
492 required to have been alive at the start of 1999 and to have been at least 45 years old on  
493 January 1, 1999.

### 494 **FinnGen Biobank**

496 The FinnGen study is a large-scale genomics initiative that has analyzed over 500,000  
497 Finnish biobank samples and correlated genetic variation with health data to understand  
498 disease mechanisms and predispositions. The project is a collaboration between research  
499 organisations and biobanks within Finland and international industry partners (45).  
500 FinnGen provides survival analyses across numerous clinical endpoints. The hazard ratios  
501 are adjusted for sex and year of birth. FinnGen bases the calculation of these hazard ratios  
502 on a wide array of clinical endpoints defined through data from nationwide registries,  
503 including, but not limited to, Statistics Finland  
504 [<https://finngen.gitbook.io/documentation/methods/endpoints>]. We downloaded the hazard  
505 ratios for AD/PD from FinnGen's Risteys R10 platform for AD using the G6\_AD\_WIDE  
506 category matching more closely the UKB grouping than G6\_AD  
507 [[https://r10.risteys.finnngen.fi/endpoints/G6\\_AD\\_WIDE](https://r10.risteys.finnngen.fi/endpoints/G6_AD_WIDE)] and for PD  
508 [[https://r10.risteys.finnngen.fi/endpoints/G6\\_PARKINSON](https://r10.risteys.finnngen.fi/endpoints/G6_PARKINSON)] to explore the putative impact  
509 of endocrine, digestive, metabolic, and nutritional disorders on the risk of AD/PD prior  
510 to diagnosis. It is important to note that not all ICD-10 codes used in our discovery phase  
511 in the UKB are represented in the FinnGen dataset. This discrepancy is perhaps due to the  
512 differences in health registries and data collection methodologies between the UKB and  
513 FinnGen biobanks.

### 514 **Polygenic Risk Score Analyses**

516 Risk allele loci and beta values from GWAS summary statistics, specifically 23 risk  
517 predictors linked to AD risk from Kunkle 2019 and 90 risk predictors associated with PD  
518 from Nalls 2019, were used to estimate PRS for AD and PD respectively (46,47). Each  
519 risk allele was assigned a weight based on the magnitude of its effect in the published  
520 studies, giving greater emphasis to alleles with higher risk estimates. Genetic variants  
521 were extracted for each individual from the UKB imputed data using the 'bgenix' package  
522 (48). The extracted variants were then converted to binary formats and used to compute  
523 the PRS score for each individual using PLINK 2.0 (49). Estimated profiles were then  
524 normalized to Z-scores based on a control reference.

### 525 **Cox Proportional Hazard Model**

527 A Cox proportional hazards model was used to calculate the hazard ratio between risk for  
528 incident AD and PD and endocrine, nutritional, metabolic, and digestive system disorders.  
529 The disorders under study are represented as 155 ICD-10 codes (table S12). In this model,  
530 January 1st, 1999 was used as the cutoff date for the diagnosis of these conditions.  
531 Consequently, any individual diagnosed with these traits before January 1st, 1999 was  
532 excluded from the analysis. Logistic regressions and Cox proportional hazards models  
533 were adjusted for age, sex, the Townsend deprivation index, and 5 PCs to account for  
534 population stratification (precomputed in UKB only). Additionally, we conducted Time-  
535 Stratified Cox Regression Analysis, for which cohorts were divided into three strata based

536 on ICD-10 codes: 1-5 years, 5-10 years, and 10-15 years prior to NDD diagnosis. ICD-10  
537 diagnoses within the specified time periods were retained, while any ICD-10 codes outside  
538 of these time frames were converted to NaN.

### 540 **Polygenic Risk Score distribution for Alzheimer's disease and Parkinson's disease**

541 A t-test was used to quantify the differences in the distribution of genetic alleles for AD or  
542 PD between individuals diagnosed only with AD or PD and individuals with an additional,  
543 significant ICD-10 diagnosis. This approach measures how much the cumulative effect of  
544 these alleles varies between the two groups. Additionally, it unveils the genetic risk  
545 profiles for AD and PD in both groups. By calculating and comparing PRSs based on  
546 alleles associated with AD or PD, the analysis evaluates how the genetic predisposition to  
547 AD or PD is increased or decreased among those individuals diagnosed with one of the  
548 ICD-10 codes in addition to AD or PD. This comparison aids in understanding whether  
549 genetic risk for AD or PD is similar or distinct in the compared subgroups of study.

### 551 **Statistical Analysis accounting for the Impact of APOE, LRRK2, and GBA1 risk 552 variants**

553 PRS analyses were adjusted for major genetic risk factors associated with AD and PD to  
554 determine if observed similarities or differences between AD/PD and the assessed ICD-10  
555 codes could be attributed to pleiotropic effects. For AD, individuals homozygous for the  
556 'C' allele at both APOE rs429358 and rs7412 were identified as having two copies of the  
557 APOE-ε4 allele, coded as '2', and one copy of the APOE-ε4 allele coded as '1' in our  
558 regression analysis to indicate a higher genetic risk. All other configurations were coded  
559 as '0'. For PD, we examined LRRK2 at rs76904798, where homozygous 'C' alleles were  
560 coded as '0', and heterozygous and homozygous for 'T' alleles as '1'. Similarly, at  
561 rs34637584 (LRRK2 G2019S), we applied '0' for homozygous 'G' alleles, and '1' for  
562 heterozygous and homozygous 'A' alleles. For GBA1, at rs35749011 (proxy for GBA1  
563 E326K), '0' was assigned to homozygous 'G' alleles, '1' to heterozygous and homozygous  
564 'A' alleles, and at rs76763715 (GBA1 N370S), '0' for homozygous 'T', and '1' for  
565 heterozygous and homozygous 'C' alleles.

### 567 **Interaction model for genetic risk across endocrine, metabolic, digestive system 568 disorders and nutritional status**

569 We aimed to understand how the interplay between genetics underlying AD and PD risk  
570 and a clinical diagnosis for any investigated ICD-10 code could eventually influence an  
571 AD or PD diagnosis. A Generalized Linear Model (GLM) was used to account for more  
572 complex relationships, where the impact of genetic risk for AD or PD (as measured by  
573 PRS) might interact differently across the diagnoses under study represented by ICD-10  
574 codes. The interaction term used in this model was: Z-score \* ICD-10 terms adjusted by  
575 sex, age and Townsend deprivation index.

### 577 **Proteomic Biomarker Data Analyses**

578 We aimed to explore differences in the levels of proteomic biomarkers associated with AD  
579 or PD between individuals with and without co-occurring ICD-10 code diagnoses related  
580 to endocrine, nutritional, metabolic, and digestive system disorders among UKB  
581 participants. For this purpose, we utilized data from the Pharma Proteome Project, which  
582 provides thousands of plasma protein biomarkers in blood samples  
583 (<https://olink.com/news/uk-biobank-pharma-proteomics-project/>). In a cross-sectional  
584 analysis, we focused on baseline (Instance\_0) proteomics data, as it includes  
585 measurements for the largest number of individuals, encompassing data for 52,705



586 individuals (at the time of data access) and a total of 1,463 proteins (table S13). These  
587 biomarkers span across cardiometabolics, inflammation, neurology, and oncology  
588 markers.

589  
590 We applied GLM to analyze 1,463 available biomarkers on AD and PD risk. The  
591 regressions were adjusted for age at recruitment, Townsend deprivation index, sex, and 5  
592 PCs. Subsequently, we selected False Discovery Rate (FDR)-corrected significant  
593 proteomic biomarkers from the GLM results. Additionally, we compared the average  
594 levels of proteomic biomarkers in isolated cases of AD/PD with cases of AD/PD co-  
595 occurring with selected ICD-10 codes (found to be significantly associated with AD or PD  
596 risk before AD/PD diagnosis). We selected FDR-corrected significant proteomic  
597 biomarkers with an OR greater than 1 and applied a t-test to compare their average levels  
598 in the isolated cases of AD or PD and cases co-occurring with specific ICD-10 codes.  
599

### 600 **Multi-modal classification model for clinical, genetics and proteomics on Alzheimer’s** 601 **disease and Parkinson’s disease risk**

602 To evaluate the role of endocrine, metabolic, digestive and nutritional status-related  
603 diagnoses in predicting AD or PD status, we developed a multi-modal classification model  
604 on a subset of the UK Biobank dataset. This subset included individuals with variables  
605 encompassing clinical diagnosis for endocrine, metabolic, digestive and nutritional status;  
606 biomarkers; demographic factors (age at recruitment, sex, and Townsend deprivation  
607 index); derived variables (Z score for the PRS); PCs; and APOE status for AD, or  
608 LRRK2/GBA1 status for the PD model. The clinical diagnoses used in these models  
609 include the ICD-10 codes found to have significant HRs in UKB. We employed a machine  
610 learning approach to compare the predictive performance of various feature sets on  
611 AD/PD outcomes. These included genetics, clinical, proteomic, demographics (including  
612 sex, age at recruitment), and combinations thereof. Each dataset was independently  
613 analyzed using a Gradient Boosting Classifier, an ensemble learning method for  
614 classification tasks [[https://scikit-  
615 learn.org/stable/modules/generated/sklearn.ensemble.GradientBoostingClassifier.html](https://scikit-learn.org/stable/modules/generated/sklearn.ensemble.GradientBoostingClassifier.html)].  
616 We conducted hyperparameter tuning through GridSearchCV, optimizing for the number  
617 of estimators, learning rate, and maximum depth. For AD classification, the grid search  
618 adjusts XGBClassifier parameters including `n_estimators` (2, 3, 5, 10, 15), `learning_rate`  
619 (0.001, 0.01, 0.1), and `max_depth` (3, 4, 5). For PD, it adjusts `n_estimators` (300, 500),  
620 `learning_rate` (0.005, 0.01), and `max_depth` (1, 2, 3). Both models use nested cross-  
621 validation, optimizing based on Receiver Operating Characteristic Area Under the Curve  
622 (ROC AUC). We used 5 folds for both inner and outer cross-validation. Feature selection  
623 was performed using the Least Absolute Shrinkage and Selection Operator (LASSO) as a  
624 part of the hyperparameter tuning procedure. The dataset was downsampled to have an  
625 equal number of cases and controls, and then scaled using StandardScaler to ensure  
626 uniformity and prevent bias due to variance in measurement scales before classification  
627 training. Model performance was evaluated based on ROC AUC and balanced accuracy  
628 (BA) scores. The 95% confidence intervals (CI) were calculated based on performance  
629 metrics obtained from a 5-fold cross-validation. We employed the Shapley Additive  
630 Explanations (SHAP) approach to assess the impact of each feature on the machine  
631 learning model predictions (50). SHAP values are derived from game theory and  
632 approximate a feature’s effect on the model. SHAP enhances understanding by creating  
633 accurate explanations for each observation. The SHAP package was used to calculate and  
634 visualize these Shapley values seen in the figures in the manuscript and the interactive



535 website. A surrogate LightGBM regression model (<https://lightgbm.readthedocs.io/>) was  
536 trained on the risk estimates to calculate SHAP values.

## 540 References:

- 541 1. Lane CA, Hardy J, Schott JM. Alzheimer's disease. *Eur J Neurol*. 2018 Jan;25(1):59–70.
- 542 2. Tolosa E, Garrido A, Scholz SW, Poewe W. Challenges in the diagnosis of Parkinson's  
543 disease. *Lancet Neurol*. 2021 May;20(5):385–97.
- 544 3. Gustavsson A, Norton N, Fast T, Frölich L, Georges J, Holzappel D, et al. Global  
545 estimates on the number of persons across the Alzheimer's disease continuum. *Alzheimers*  
546 *Dement*. 2023 Feb;19(2):658–70.
- 547 4. Ou Z, Pan J, Tang S, Duan D, Yu D, Nong H, et al. Global Trends in the Incidence,  
548 Prevalence, and Years Lived With Disability of Parkinson's Disease in 204  
549 Countries/Territories From 1990 to 2019. *Front Public Health*. 2021 Dec 7;9:776847.
- 550 5. Rabinovici GD. Late-onset Alzheimer Disease. *Continuum* . 2019 Feb;25(1):14–33.
- 551 6. Simon DK, Tanner CM, Brundin P. Parkinson Disease Epidemiology, Pathology,  
552 Genetics, and Pathophysiology. *Clin Geriatr Med*. 2020 Feb;36(1):1–12.
- 553 7. Bellou V, Belbasis L, Tzoulaki I, Evangelou E, Ioannidis JPA. Environmental risk factors  
554 and Parkinson's disease: An umbrella review of meta-analyses. *Parkinsonism Relat*  
555 *Disord*. 2016 Feb;23:1–9.
- 556 8. Migliore L, Coppedè F. Gene-environment interactions in Alzheimer disease: the  
557 emerging role of epigenetics. *Nat Rev Neurol*. 2022 Nov;18(11):643–60.
- 558 9. Santiago JA, Potashkin JA. The Impact of Disease Comorbidities in Alzheimer's Disease.  
559 *Front Aging Neurosci*. 2021 Feb 12;13:631770.
- 560 10. Santiago JA, Bottero V, Potashkin JA. Biological and Clinical Implications of  
561 Comorbidities in Parkinson's Disease. *Front Aging Neurosci*. 2017 Dec 4;9:394.
- 562 11. Tan AH, Lim SY, Lang AE. The microbiome-gut-brain axis in Parkinson disease - from  
563 basic research to the clinic. *Nat Rev Neurol*. 2022 Aug;18(8):476–95.
- 564 12. Kowalski K, Mulak A. Brain-Gut-Microbiota Axis in Alzheimer's Disease. *J*  
565 *Neurogastroenterol Motil*. 2019 Jan 31;25(1):48–60.
- 566 13. Kang J, Lee M, Park M, Lee J, Lee S, Park J, et al. Slow gut transit increases the risk of  
567 Alzheimer's disease: An integrated study of the bi-national cohort in South Korea and  
568 Japan and Alzheimer's disease model mice. *J Advert Res [Internet]*. 2023 Dec 13;  
569 Available from: <http://dx.doi.org/10.1016/j.jare.2023.12.010>
- 570 14. Moon JH. Endocrine Risk Factors for Cognitive Impairment. *Endocrinol Metab (Seoul)*.  
571 2016 Jun;31(2):185–92.
- 572 15. Charoenngam N, Rittiphairoj T, Ponvilawan B, Prasongdee K. Thyroid Dysfunction and  
573 Risk of Parkinson's Disease: A Systematic Review and Meta-Analysis. *Front Endocrinol* .  
574 2022 May 4;13:863281.
- 575 16. Chai B, Gao F, Wu R, Dong T, Gu C, Lin Q, et al. Vitamin D deficiency as a risk factor  
576 for dementia and Alzheimer's disease: an updated meta-analysis. *BMC Neurol*. 2019 Nov  
577 13;19(1):284.
- 578 17. Pignolo A, Mastrilli S, Davì C, Arnao V, Aridon P, Dos Santos Mendes FA, et al. Vitamin  
579 D and Parkinson's Disease. *Nutrients [Internet]*. 2022 Mar 14;14(6). Available from:  
580 <http://dx.doi.org/10.3390/nu14061220>

- 581 18. Colca JR, Finck BN. Metabolic Mechanisms Connecting Alzheimer's and Parkinson's  
582 Diseases: Potential Avenues for Novel Therapeutic Approaches. *Front Mol Biosci.* 2022  
583 Jun 16;9:929328.
- 584 19. Kim JH, Lee HS, Kim YH, Kwon MJ, Kim JH, Min CY, et al. The Association Between  
585 Thyroid Diseases and Alzheimer's Disease in a National Health Screening Cohort in  
586 Korea. *Front Endocrinol.* 2022 Mar 7;13:815063.
- 587 20. Ma LY, Zhao B, Ou YN, Zhang DD, Li QY, Tan L. Association of thyroid disease with  
588 risks of dementia and cognitive impairment: A meta-analysis and systematic review. *Front*  
589 *Aging Neurosci.* 2023 Mar 13;15:1137584.
- 590 21. Han K, Kim B, Lee SH, Kim MK. A nationwide cohort study on diabetes severity and risk  
591 of Parkinson disease. *NPJ Parkinsons Dis.* 2023 Jan 27;9(1):11.
- 592 22. Chohan H, Senkevich K, Patel RK, Bestwick JP, Jacobs BM, Bandres Ciga S, et al. Type  
593 2 Diabetes as a Determinant of Parkinson's Disease Risk and Progression. *Mov Disord.*  
594 2021 Jun;36(6):1420–9.
- 595 23. Athanasaki A, Melanis K, Tsantzali I, Stefanou MI, Ntymenou S, Paraskevas SG, et al.  
596 Type 2 Diabetes Mellitus as a Risk Factor for Alzheimer's Disease: Review and Meta-  
597 Analysis. *Biomedicines* [Internet]. 2022 Mar 27;10(4). Available from:  
598 <http://dx.doi.org/10.3390/biomedicines10040778>
- 599 24. Nowell J, Blunt E, Gupta D, Edison P. Antidiabetic agents as a novel treatment for  
700 Alzheimer's and Parkinson's disease. *Ageing Res Rev.* 2023 Aug;89:101979.
- 701 25. Zhao Y, Sun Y, Ji HF, Shen L. Vitamin D levels in Alzheimer's and Parkinson's diseases:  
702 a meta-analysis. *Nutrition.* 2013 Jun;29(6):828–32.
- 703 26. Konings B, Villatoro L, Van den Eynde J, Barahona G, Burns R, McKnight M, et al.  
704 Gastrointestinal syndromes preceding a diagnosis of Parkinson's disease: testing Braak's  
705 hypothesis using a nationwide database for comparison with Alzheimer's disease and  
706 cerebrovascular diseases. *Gut.* 2023 Nov;72(11):2103–11.
- 707 27. Yuan S, Dan L, Zhang Y, Wu J, Zhao J, Kivipelto M, et al. Digestive System Diseases,  
708 Genetic Risk, and Incident Dementia: A Prospective Cohort Study. *Am J Prev Med.* 2024  
709 Mar;66(3):516–25.
- 710 28. Delcò F, Sonnenberg A. Associations between hemorrhoids and other diagnoses. *Dis*  
711 *Colon Rectum.* 1998 Dec;41(12):1534–41; discussion 1541–2.
- 712 29. Cameron R, Walker MM, Thuresson M, Roelstraete B, Sköldbberg F, Olén O, et al.  
713 Mortality risk increased in colonic diverticular disease: a nationwide cohort study. *Ann*  
714 *Epidemiol.* 2022 Dec;76:39–49.
- 715 30. Lucey BC, Varghese JC, Soto JA. Spontaneous hemoperitoneum: causes and significance.  
716 *Curr Probl Diagn Radiol.* 2005 Sep-Oct;34(5):182–95.
- 717 31. van Goor H. Consequences and complications of peritoneal adhesions. *Colorectal Dis.*  
718 2007 Oct;9 Suppl 2:25–34.
- 719 32. Falconi M, Pederzoli P. The relevance of gastrointestinal fistulae in clinical practice: a  
720 review. *Gut.* 2001 Dec;49 Suppl 4(Suppl 4):iv2–10.
- 721 33. Gao S, Hendrie HC, Hall KS, Hui S. The relationships between age, sex, and the incidence  
722 of dementia and Alzheimer disease: a meta-analysis. *Arch Gen Psychiatry.* 1998  
723 Sep;55(9):809–15.
- 724 34. Pringsheim T, Jette N, Frolkis A, Steeves TDL. The prevalence of Parkinson's disease: a  
725 systematic review and meta-analysis. *Mov Disord.* 2014 Nov;29(13):1583–90.
- 726 35. Momtaz YA, Hamid TA, Ibrahim R. Gastritis May Boost Odds of Dementia. *Am J*  
727 *Alzheimers Dis Other Demen.* 2014 Aug;29(5):452–6.
- 728 36. Baglietto-Vargas D, Shi J, Yaeger DM, Ager R, LaFerla FM. Diabetes and Alzheimer's  
729 disease crosstalk. *Neurosci Biobehav Rev.* 2016 May;64:272–87.

- 730 37. Haan MN. Therapy Insight: type 2 diabetes mellitus and the risk of late-onset Alzheimer's  
731 disease. *Nat Clin Pract Neurol*. 2006 Mar;2(3):159–66.
- 732 38. Xu Q, Park Y, Huang X, Hollenbeck A, Blair A, Schatzkin A, et al. Diabetes and risk of  
733 Parkinson's disease. *Diabetes Care*. 2011 Apr;34(4):910–5.
- 734 39. Doulberis M, Kotronis G, Gialamprinou D, Polyzos SA, Papaefthymiou A, Katsinelos P,  
735 et al. Alzheimer's disease and gastrointestinal microbiota; impact of infection  
736 involvement. *Int J Neurosci*. 2021 Mar;131(3):289–301.
- 737 40. Li Y, Chen Y, Jiang L, Zhang J, Tong X, Chen D, et al. Intestinal Inflammation and  
738 Parkinson's Disease. *Aging Dis*. 2021 Dec;12(8):2052–68.
- 739 41. Kim KY, Shin KY, Chang KA. GFAP as a Potential Biomarker for Alzheimer's Disease:  
740 A Systematic Review and Meta-Analysis. *Cells* [Internet]. 2023 May 4;12(9). Available  
741 from: <http://dx.doi.org/10.3390/cells12091309>
- 742 42. Szeliga M. Peroxiredoxins in Neurodegenerative Diseases. *Antioxidants (Basel)* [Internet].  
743 2020 Nov 30;9(12). Available from: <http://dx.doi.org/10.3390/antiox9121203>
- 744 43. Karantzoulis S, Galvin JE. Distinguishing Alzheimer's disease from other major forms of  
745 dementia. *Expert Rev Neurother*. 2011 Nov;11(11):1579–91.
- 746 44. Population Data Science [Internet]. 2019 [cited 2024 Jun 30]. Secure Anonymised  
747 Information Linkage Databank (SAIL Databank). Available from:  
748 <https://popdatasci.swan.ac.uk/centres-of-excellence/sail/>
- 749 45. Kurki MI, Karjalainen J, Palta P, Sipilä TP, Kristiansson K, Donner KM, et al. FinnGen  
750 provides genetic insights from a well-phenotyped isolated population. *Nature*. 2023  
751 Jan;613(7944):508–18.
- 752 46. Kunkle BW, Grenier-Boley B, Sims R, Bis JC, Damotte V, Naj AC, et al. Genetic meta-  
753 analysis of diagnosed Alzheimer's disease identifies new risk loci and implicates A $\beta$ , tau,  
754 immunity and lipid processing. *Nat Genet*. 2019 Mar;51(3):414–30.
- 755 47. Nalls MA, Blauwendraat C, Vallerga CL, Heilbron K, Bandres-Ciga S, Chang D, et al.  
756 Identification of novel risk loci, causal insights, and heritable risk for Parkinson's disease:  
757 a meta-analysis of genome-wide association studies. *Lancet Neurol*. 2019  
758 Dec;18(12):1091–102.
- 759 48. Collister JA, Liu X, Clifton L. Calculating Polygenic Risk Scores (PRS) in UK Biobank:  
760 A Practical Guide for Epidemiologists. *Front Genet*. 2022 Feb 18;13:818574.
- 761 49. Chang CC, Chow CC, Tellier LC, Vattikuti S, Purcell SM, Lee JJ. Second-generation  
762 PLINK: rising to the challenge of larger and richer datasets. *Gigascience*. 2015 Feb  
763 25;4:7.
- 764 50. Lundberg SM, Lee SI. A unified approach to interpreting model predictions. In:  
765 *Proceedings of the 31st International Conference on Neural Information Processing*  
766 *Systems*. Red Hook, NY, USA: Curran Associates Inc.; 2017. p. 4768–77. (NIPS' 17).  
767  
768  
769

## 770 **Acknowledgments:**

### 771 **Funding:**

772 Intramural Research Program of the NIH, National Institute on Aging (NIA), National  
773 Institutes of Health, Department of Health and Human Services; project number ZO1  
774 AG000534  
775 National Institute of Neurological Disorders and Stroke  
776

777 Dementia Research Institute [UKDRI supported by the Medical Research Council  
778 (UKDRI-3003), Alzheimer’s Research UK, and Alzheimer’s Society]  
779 Welsh Government Joint Programming for Neurodegeneration (MRC: MR/T04604X/1)  
780 Dementia Platforms UK (MRC: MR/L023784/2)  
781 MRC Centre for Neuropsychiatric Genetics and Genomics (MR/L010305/1)  
782

783 **Author contributions:**

784 Conceptualization: MS, SBC, KSL  
785 Data acquisition and processing: MS, ES, KSL, HLL, CB, HI, MAN  
786 Data analysis: MS, ES, KSL  
787 Interpretation: All authors contributed  
788 Writing: All authors contributed  
789

790 **Competing interests:**

791 KSL, HLL, HI, and MAN’s participation in this project was part of a competitive contract  
792 awarded to Data Tecnica International LLC by the National Institutes of Health to support  
793 open science research. MAN also currently serves on the scientific advisory board at  
794 Clover Therapeutics and is an advisor and scientific founder at Neuron23 Inc. All other  
795 authors declare they have no competing interests.  
796

797 **Data and materials availability:**

798 Notebooks containing code used in this analysis can be found in the GitHub link here:  
799 [<https://github.com/NIH-CARD/Gut-Brain-Nexus>]. This paper analyzes existing, publicly  
800 available data. In addition, complete summary statistics describing these data/processed  
801 datasets derived from these data have been deposited in the supplementary materials  
802 connected to this publication and are publicly available as of the date of publication.  
803 Further, we have developed an interactive resource for the scientific community  
804 [<https://gut-brain-nexus.streamlit.app/>] where researchers can investigate components of  
805 the predictive model and can investigate feature effects on a sample level.  
806  
807  
808

## Figures and Tables:

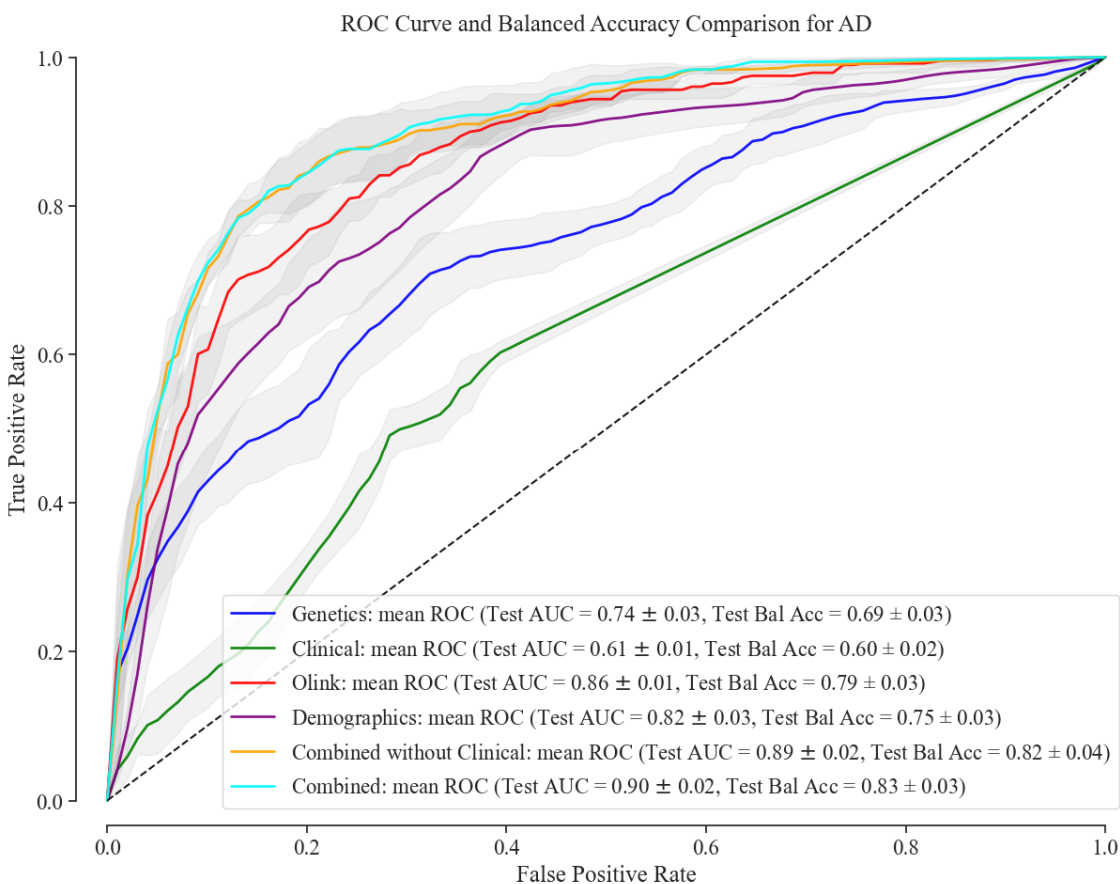

**Fig. 1. Receiver Operating Characteristic Curve and Balanced Accuracy Comparison for AD.** Performance evaluation of multi-omics integration models using clinical, genetic, proteomic, and demographic data for AD.



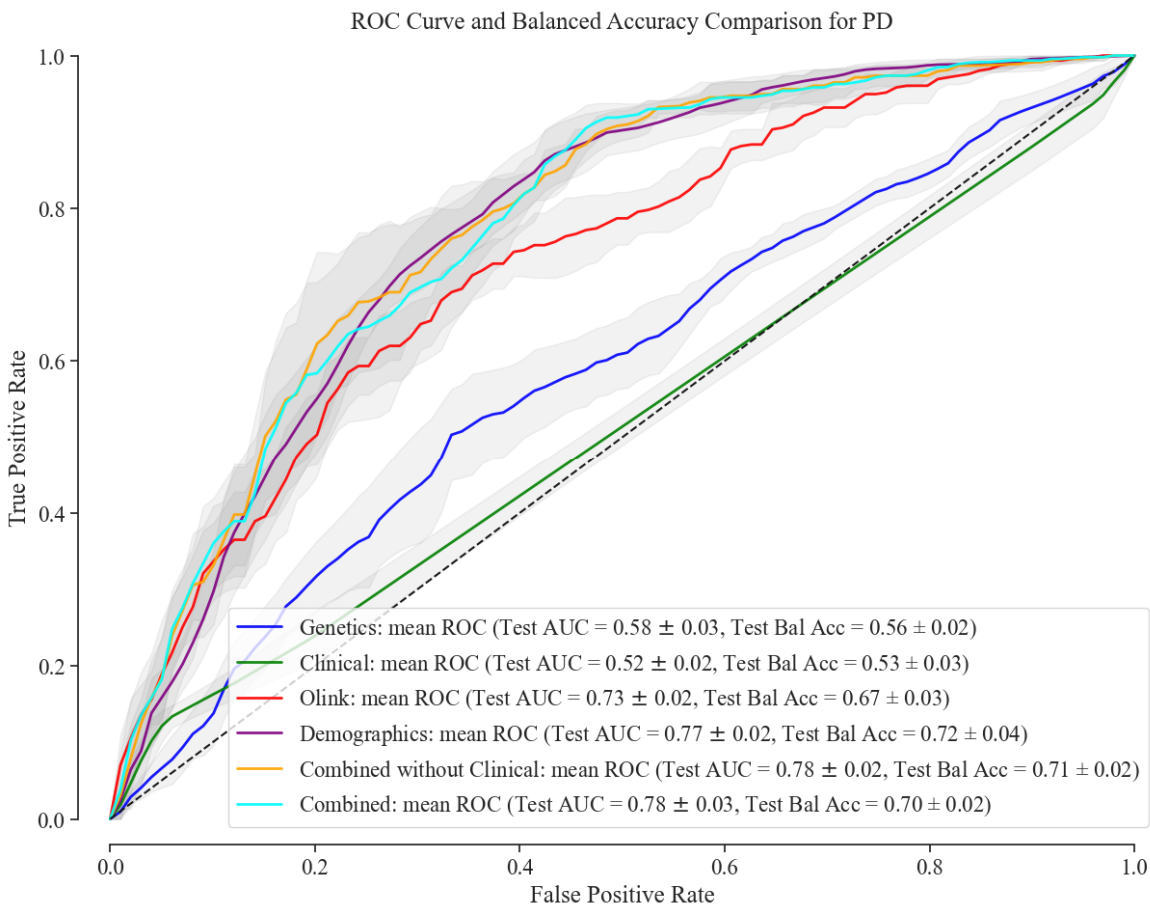

**Fig. 2. Receiver Operating Characteristic Curve and Balanced Accuracy Comparison for PD.** Performance evaluation of multi-omics integration models using clinical, genetic, proteomic, and demographic data for PD.

317  
318  
319  
320  
321

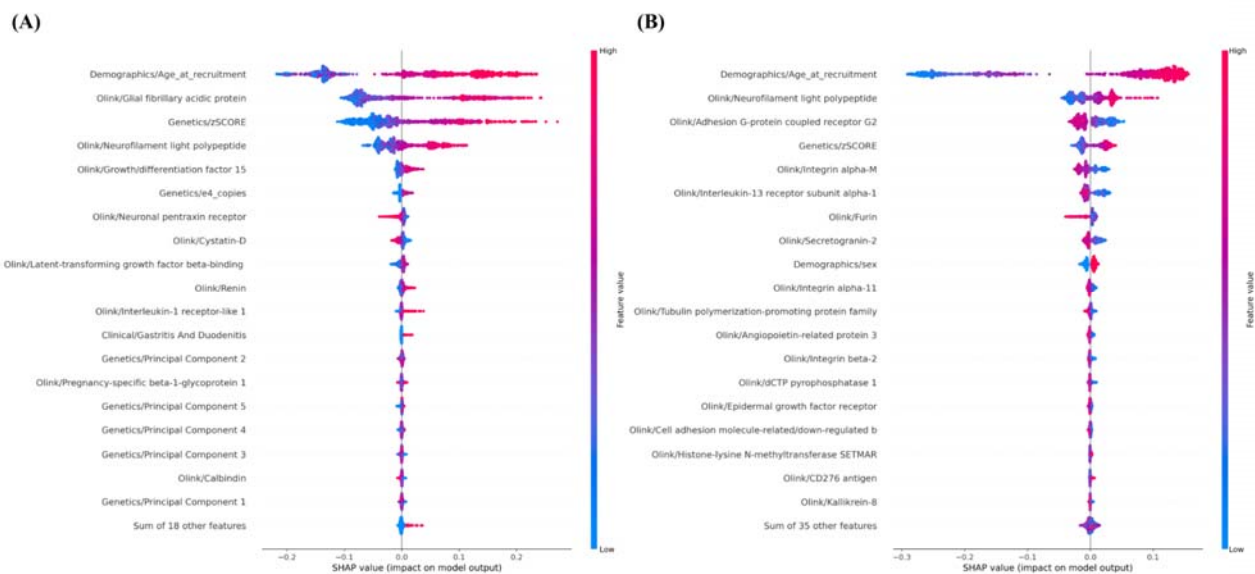

**Fig. 3. Feature Importance Plots.** (A) Distribution of the top 20 features that had the most substantial effect on the Alzheimer's Disease risk estimates. Each point represents a patient and the amount of effect on model output for each feature depends on its Shapley Additive Explanations (SHAP) value. For example, the effect of the "Demographics/Age\_at\_recruitment" feature on model output is large and positive (indicating a higher risk) when the patient has high values for "Demographics/Age\_at\_recruitment" (more red points are on the right side). Similarly, (B) shows the top features for Parkinson's Disease risk estimates.

322  
323  
324  
325  
326  
327  
328  
329  
330  
331

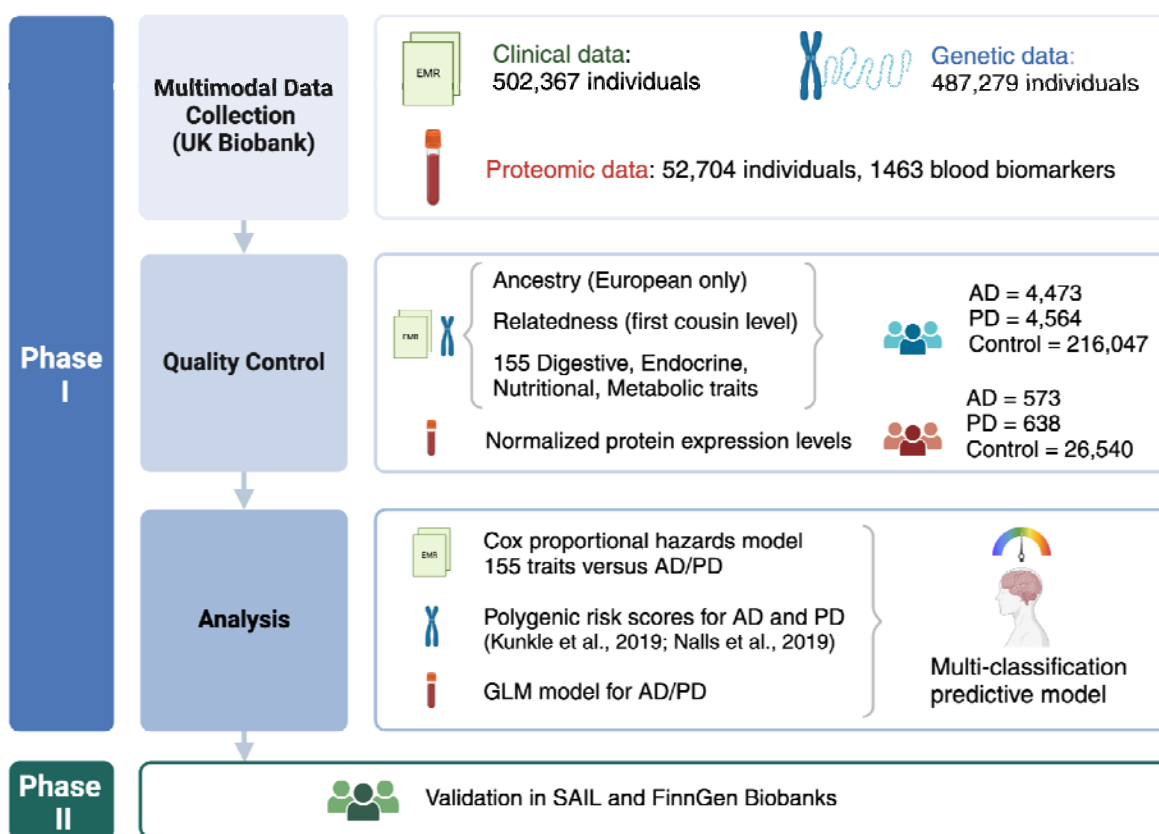

**Fig. 4. Study design.** The initial phase of our study utilized clinical data sourced from electronic medical records (EMR) alongside genetic and proteomic data obtained from the UK Biobank. Quality control procedures were rigorously applied to clinical and genetic datasets, including filtering for individuals of European ancestry, exclusion of related samples, and extraction of 155 ICD-10 codes representing diagnoses related to digestive, endocrine, nutritional, and metabolic disorders. Proteomic data underwent normalization of protein expression levels as part of quality control measures. The culmination of this phase involved the application of a Cox proportional hazards model, examination of polygenic risk scores, and development of a generalized linear model (GLM). These analyses collectively contributed to the construction of a multi-classification predictive model for Alzheimer’s disease (AD) and Parkinson’s disease (PD). Phase II of our study entailed validating these findings using data from the Secure Anonymised Information Linkage (SAIL) and FinnGen biobanks.

| Prior_IC<br>D10_cod<br>e | Prior_IC<br>D10_cod<br>e_<br>Description                                             | Dataset | Neurode<br>generativ<br>e disease<br>outcome | Hazard<br>Ratio | ci_min | ci_max | P_VAL    | P_VAL_<br>FDR_CO<br>RRECT<br>ED | N_pairs  | n      |
|--------------------------|--------------------------------------------------------------------------------------|---------|----------------------------------------------|-----------------|--------|--------|----------|---------------------------------|----------|--------|
| E85                      | amyloido<br>sis,<br>other/uns<br>pecified                                            | Finngen | AD                                           | 3.98            | 1.20   | 13.27  | 2.44E-02 | 3.65E-02                        | 17       | 182    |
|                          | amyloido<br>sis                                                                      | UKB     |                                              | 2.57            | 1.34   | 4.94   | 4.72E-03 | 2.61E-02                        | 9        |        |
| K04                      | diseases<br>of pulp<br>and<br>periapical<br>tissues                                  | Finngen | AD                                           | 2.83            | 1.67   | 4.82   | 1.17E-04 | 2.68E-04                        | 267      | 3,365  |
|                          | diseases<br>of pulp<br>and<br>periapical<br>tissues                                  | UKB     |                                              | 1.44            | 1.11   | 1.87   | 6.21E-03 | 3.26E-02                        | 57       |        |
| E78                      | disorders<br>of<br>lipoprotei<br>n<br>metabolis<br>m and<br>other<br>lipidaemi<br>as | Finngen | AD                                           | 5.71            | 4.76   | 6.85   | 1.55E-78 | 1.46E-76                        | 2,522.00 | 53,797 |
|                          | disorders<br>of<br>lipoprotei<br>n<br>metabolis<br>m and<br>other<br>lipidaemi<br>as | UKB     |                                              | 1.18            | 1.09   | 1.27   | 1.53E-05 | 1.34E-04                        | 1090     |        |
| E83                      | disorders<br>of<br>mineral<br>metabolis<br>m                                         | Finngen | AD                                           | 6.63            | 3.51   | 12.51  | 5.26E-09 | 2.10E-08                        | 68.00    | 4,435  |
|                          | disorders<br>of<br>mineral<br>metabolis<br>m                                         | UKB     |                                              | 1.32            | 1.08   | 1.62   | 7.75E-03 | 3.88E-02                        | 94       |        |
| K29                      | other<br>gastritis<br>(incl.<br>Duodeniti<br>s)                                      | Finngen | AD                                           | 2.40            | 1.53   | 3.77   | 1.35E-04 | 3.06E-04                        | 416.00   |        |

|     |                                                   |         |    |      |      |      |          |          |        |        |
|-----|---------------------------------------------------|---------|----|------|------|------|----------|----------|--------|--------|
|     | gastritis and duodenitis                          | UKB     |    | 1.20 | 1.09 | 1.32 | 1.45E-04 | 1.17E-03 | 523    | 27,914 |
| K64 | haemorrhoids and perianal venous thrombosis       | Sail    | AD | 0.37 | 0.27 | 0.51 | 6.83E-10 | 8.64E-09 | 39     | 11,389 |
|     | haemorrhoids and perianal venous thrombosis       | UKB     |    | 0.69 | 0.59 | 0.80 | 6.94E-07 | 8.10E-06 | 186    | 20,162 |
| E10 | Type 1 diabetes, wide definition * (includes E10) | Finngen | AD | 2.46 | 1.63 | 3.70 | 1.60E-05 | 4.22E-05 | 272    |        |
|     | insulin-dependent diabetes mellitus               | Sail    |    | 1.78 | 1.48 | 2.13 | 4.29E-10 | 5.68E-09 | 118    | 6,668  |
|     | insulin-dependent diabetes mellitus               | UKB     |    | 3.09 | 2.45 | 3.90 | 1.77E-21 | 1.86E-19 | 73     | 1,633  |
| E11 | Type 2 diabetes, wide definition *(includes E11)  | Finngen | AD | 4.02 | 3.28 | 4.92 | 2.54E-41 | 8.54E-40 | 2641   |        |
|     | non-insulin-dependent diabetes mellitus           | Sail    |    | 1.27 | 1.19 | 1.35 | 3.77E-14 | 8.43E-13 | 1052   | 72,913 |
|     | non-insulin-dependent diabetes mellitus           | UKB     |    | 1.47 | 1.33 | 1.63 | 1.19E-14 | 4.18E-13 | 476    | 19,048 |
| K20 | oesophagitis                                      | Finngen | AD | 4.23 | 2.20 | 8.13 | 1.58E-05 | 4.16E-05 | 77.00  |        |
|     | oesophagitis                                      | UKB     |    | 1.28 | 1.10 | 1.49 | 1.63E-03 | 1.00E-02 | 175    | 8,660  |
| A04 | other                                             | Finngen | AD | 2.56 | 1.22 | 5.37 | 1.27E-02 | 2.01E-02 | 255.00 |        |



|     |                                                             |         |    |       |      |       |          |          |        |        |
|-----|-------------------------------------------------------------|---------|----|-------|------|-------|----------|----------|--------|--------|
|     | bacterial intestinal infections                             |         |    |       |      |       |          |          |        |        |
|     | other bacterial intestinal infections                       | Sail    |    | 1.37  | 1.14 | 1.65  | 6.29E-04 | 2.95E-03 | 117    | 6,202  |
|     | other bacterial intestinal infections                       | UKB     |    | 1.51  | 1.21 | 1.89  | 2.35E-04 | 1.76E-03 | 81     | 3,585  |
| E87 | other disorders of fluid, electrolyte and acid-base balance | Finngen | AD | 10.04 | 7.24 | 13.93 | 2.11E-43 | 8.07E-42 | 600.00 |        |
|     | other disorders of fluid, electrolyte and acid-base balance | UKB     |    | 1.51  | 1.34 | 1.70  | 6.43E-12 | 1.35E-10 | 312    | 11,313 |
| K59 | other functional intestinal disorders                       | Finngen | AD | 4.37  | 3.30 | 5.80  | 1.02E-24 | 1.51E-23 | 886.00 |        |
|     | other functional intestinal disorders                       | Sail    |    | 1.19  | 1.09 | 1.29  | 9.59E-05 | 5.47E-04 | 529    | 29,639 |
|     | other functional intestinal disorders                       | UKB     |    | 1.55  | 1.40 | 1.73  | 3.55E-16 | 1.86E-14 | 394    | 15,596 |
| K52 | other noninfective gastroenteritis and colitis              | Finngen | AD | 2.53  | 1.40 | 4.57  | 2.15E-03 | 3.98E-03 | 300.00 |        |
|     | other non-infective gastroenteritis and colitis             | Sail    |    | 1.36  | 1.22 | 1.50  | 4.97E-09 | 5.56E-08 | 373    | 23,128 |
|     | other non-                                                  | UKB     | AD | 1.37  | 1.20 | 1.56  | 1.75E-06 | 1.84E-05 | 250    | 12,984 |

|     |                                        |         |    |       |      |       |          |          |        |       |
|-----|----------------------------------------|---------|----|-------|------|-------|----------|----------|--------|-------|
|     | infective gastro-enteritis and colitis |         |    |       |      |       |          |          |        |       |
| E14 | unspecified diabetes mellitus          | Sail    |    | 1.49  | 1.19 | 1.88  | 6.05E-04 | 2.89E-03 | 73     | 4,470 |
|     | unspecified diabetes mellitus          | UKB     | AD | 1.53  | 1.33 | 1.75  | 1.21E-09 | 1.58E-08 | 224    | 8,733 |
| E55 | vitamin d deficiency                   | Finngen | AD | 13.48 | 4.76 | 38.22 | 9.94E-07 | 3.16E-06 | 26.00  |       |
|     | vitamin d deficiency                   | UKB     |    | 1.95  | 1.57 | 2.41  | 9.97E-10 | 1.50E-08 | 87     | 2,405 |
| E86 | volume depletion                       | Finngen | AD | 10.65 | 4.09 | 27.71 | 1.24E-06 | 3.88E-06 | 161.00 |       |
|     | volume depletion                       | UKB     |    | 1.78  | 1.52 | 2.10  | 3.26E-12 | 8.57E-11 | 153    | 4,911 |

348  
349  
350  
351  
352  
353  
354  
355  
356  
357  
358

**Table 1. Replicated diagnoses in endocrine, nutritional, metabolic, and digestive systems associated with Alzheimer’s Disease (AD) risk.** UKB: UK Biobank. SAIL: Secure Anonymised Information Linkage Databank. Prior\_ICD10\_code: initial diagnosis of endocrine, metabolic, digestive system, and nutritional disorders. ci\_min: Confidence interval minimum. ci\_max: Confidence interval maximum. P\_VAL: p-value. P\_VAL\_FDR\_CORRECTED: p-value after False Discovery Rate corrected. N\_pairs: Number of individuals identified with both ICD-10 code and neurodegenerative disease outcome. n: Number of individuals identified with ICD-10 code.

| Prior_I<br>CD10_c<br>ode | Prior_I<br>CD10_c<br>ode_Des<br>cription                         | Dataset | Neurode<br>generati<br>ve<br>disease<br>outcome | Hazard<br>Ratio | ci_min | ci_max | P_VAL    | P_VAL_<br>FDR_C<br>ORREC<br>TED | N_pairs | n             |
|--------------------------|------------------------------------------------------------------|---------|-------------------------------------------------|-----------------|--------|--------|----------|---------------------------------|---------|---------------|
| K57                      | diverticu<br>lar<br>disease<br>of<br>intestine                   | Sail    | PD                                              | 0.75            | 0.69   | 0.81   | 1.74E-11 | 2.82E-10                        | 555.00  | 70,198.0<br>0 |
|                          | diverticu<br>lar<br>disease<br>of<br>intestine                   | UKB     |                                                 | 0.69            | 0.62   | 0.77   | 6.24E-11 | 2.04E-09                        | 354.00  | 34,801.0<br>0 |
| K30                      | functiona<br>l<br>dyspepsi<br>a                                  | Finngen | PD                                              | 2.72            | 1.96   | 3.76   | 1.95E-09 | 1.21E-08                        | 86.00   |               |
|                          | dyspepsi<br>a                                                    | UKB     |                                                 | 1.34            | 1.13   | 1.60   | 8.51E-04 | 9.26E-03                        | 135.00  | 8,811.00      |
| E10                      | insulin-<br>depende<br>nt<br>diabetes<br>mellitus                | Sail    | PD                                              | 1.59            | 1.31   | 1.93   | 3.36E-06 | 2.48E-05                        | 101.00  | 6,668.00      |
|                          | insulin-<br>depende<br>nt<br>diabetes<br>mellitus                | UKB     |                                                 | 2.65            | 2.02   | 3.48   | 2.44E-12 | 1.20E-10                        | 53.00   | 1,608.00      |
| E11                      | Type 2<br>diabetes,<br>wide<br>definitio<br>n*(Inclu<br>des E11) | Finngen | PD                                              | 2.04            | 1.75   | 2.39   | 2.06E-19 | 3.38E-18                        | 421.00  |               |
|                          | non-<br>insulin-<br>depende<br>nt<br>diabetes<br>mellitus        | UKB     |                                                 | 1.21            | 1.08   | 1.36   | 1.36E-03 | 1.33E-02                        | 330.00  | 18,815.0<br>0 |
| K63                      | other<br>diseases<br>of                                          | Sail    | PD                                              | 0.84            | 0.73   | 0.97   | 1.51E-02 | 4.71E-02                        | 205.00  | 25,877.0<br>0 |

|     |                                       |         |    |      |      |      |          |          |        |           |
|-----|---------------------------------------|---------|----|------|------|------|----------|----------|--------|-----------|
|     | intestine                             |         |    |      |      |      |          |          |        |           |
|     | other diseases of intestine           | UKB     |    | 0.69 | 0.59 | 0.80 | 1.34E-06 | 2.20E-05 | 183.00 | 19,139.00 |
| K66 | other disorders of peritoneum         | Sail    | PD | 0.70 | 0.53 | 0.93 | 1.32E-02 | 4.21E-02 | 48.00  | 7,406.00  |
|     | other disorders of peritoneum         | UKB     |    | 0.63 | 0.45 | 0.87 | 5.81E-03 | 4.42E-02 | 35.00  | 4,612.00  |
| K59 | other functional intestinal disorders | Finngen | PD | 3.19 | 2.46 | 4.14 | 2.02E-18 | 3.02E-17 | 178.00 |           |
|     | other functional intestinal disorders | UKB     |    | 1.56 | 1.38 | 1.76 | 4.81E-13 | 4.71E-11 | 301.00 | 15,431.00 |

**Table 2. Replicated diagnoses in endocrine, nutritional, metabolic, and digestive systems associated with Parkinson’s Disease (PD) risk.** UKB: UK Biobank. SAIL: Secure Anonymised Information Linkage Databank. Prior\_ICD10\_code: initial diagnosis of endocrine, metabolic, digestive system, and nutritional disorders. ci\_min: Confidence interval minimum. ci\_max: Confidence interval maximum. P\_VAL: p-value. P\_VAL\_FDR\_CORRECTED: p-value after False Discovery Rate corrected. N\_pairs: Number of individuals identified with both ICD-10 code and neurodegenerative disease outcome. n: Number of individuals identified with ICD10\_code.

371  
372  
373

| ICD10_code | ICD10_code_description                  | ICD10_diagnosis_range | Neurodegenerative disease outcome | Hazard Ratio | ci_min | ci_max | P_VAL    | N_pairs | n     | P_VAL_FDR_CORRECTED |
|------------|-----------------------------------------|-----------------------|-----------------------------------|--------------|--------|--------|----------|---------|-------|---------------------|
| A04        | Other Bacterial Intestinal Infections   | 1-5                   | AD                                | 2.12         | 1.28   | 3.53   | 3.63E-03 | 15      | 434   | 6.60E-03            |
| A04        | Other Bacterial Intestinal Infections   | All                   | AD                                | 1.51         | 1.21   | 1.89   | 2.35E-04 | 81      | 3585  | 3.35E-04            |
| E10        | Insulin-Dependent Diabetes Mellitus     | 1-5                   | AD                                | 3.13         | 1.85   | 5.29   | 2.05E-05 | 14      | 325   | 5.11E-05            |
| E10        | Insulin-Dependent Diabetes Mellitus     | 5-10                  | AD                                | 3.08         | 1.94   | 4.90   | 1.96E-06 | 18      | 398   | 9.78E-06            |
| E10        | Insulin-Dependent Diabetes Mellitus     | 10-15                 | AD                                | 3.68         | 2.32   | 5.85   | 3.55E-08 | 18      | 318   | 1.60E-07            |
| E10        | Insulin-Dependent Diabetes Mellitus     | All                   | AD                                | 3.09         | 2.45   | 3.90   | 1.77E-21 | 73      | 1633  | 3.55E-20            |
| E11        | Non-Insulin-Dependent Diabetes Mellitus | 5-10                  | AD                                | 1.32         | 1.11   | 1.58   | 1.91E-03 | 128     | 5496  | 4.78E-03            |
| E11        | Non-Insulin-Dependent Diabetes Mellitus | 10-15                 | AD                                | 1.82         | 1.53   | 2.17   | 1.59E-11 | 133     | 4023  | 2.86E-10            |
| E11        | Non-Insulin-Dependent Diabetes Mellitus | All                   | AD                                | 1.47         | 1.33   | 1.63   | 1.19E-14 | 476     | 19048 | 7.96E-14            |



|     |                                                  |       |    |      |      |      |          |     |      |          |
|-----|--------------------------------------------------|-------|----|------|------|------|----------|-----|------|----------|
| E14 | Unspecified Diabetes Mellitus                    | 5-10  | AD | 1.79 | 1.13 | 2.85 | 1.36E-02 | 18  | 827  | 2.47E-02 |
| E14 | Unspecified Diabetes Mellitus                    | 10-15 | AD | 2.28 | 1.76 | 2.94 | 4.16E-10 | 59  | 1803 | 3.74E-09 |
| E14 | Unspecified Diabetes Mellitus                    | All   | AD | 1.53 | 1.33 | 1.75 | 1.21E-09 | 224 | 8733 | 3.02E-09 |
| E16 | Other Disorders Of Pancreatic Internal Secretion | 1-5   | AD | 3.52 | 2.41 | 5.15 | 7.75E-11 | 27  | 374  | 1.55E-09 |
| E16 | Other Disorders Of Pancreatic Internal Secretion | 5-10  | AD | 1.87 | 1.21 | 2.91 | 5.12E-03 | 20  | 525  | 1.02E-02 |
| E16 | Other Disorders Of Pancreatic Internal Secretion | 10-15 | AD | 2.69 | 1.34 | 5.38 | 5.23E-03 | 8   | 180  | 1.18E-02 |
| E16 | Other Disorders Of Pancreatic Internal Secretion | All   | AD | 2.23 | 1.75 | 2.83 | 5.27E-11 | 69  | 1637 | 1.76E-10 |
| E53 | Deficiency Of Other B Group Vitamins             | 1-5   | AD | 2.33 | 1.66 | 3.27 | 9.65E-07 | 34  | 700  | 3.86E-06 |
| E53 | Deficiency Of Other B Group Vitamins             | 5-10  | AD | 1.74 | 1.08 | 2.80 | 2.29E-02 | 17  | 509  | 3.81E-02 |
| E53 | Deficiency Of Other B Group Vitamins             | All   | AD | 1.78 | 1.40 | 2.27 | 2.61E-06 | 68  | 1939 | 4.75E-06 |
| E55 | Vitamin D Deficiency                             | 1-5   | AD | 2.35 | 1.80 | 3.06 | 2.47E-10 | 56  | 1198 | 2.47E-09 |
| E55 | Vitamin                                          | All   | AD | 1.95 | 1.57 | 2.41 | 9.97E-10 | 87  | 2405 | 2.85E-09 |

|     |                                                           |       |    |      |      |      |          |      |       |          |
|-----|-----------------------------------------------------------|-------|----|------|------|------|----------|------|-------|----------|
|     | D Deficiency                                              |       |    |      |      |      |          |      |       |          |
| E66 | Obesity                                                   | All   | AD | 0.85 | 0.74 | 0.96 | 9.29E-03 | 260  | 22619 | 9.29E-03 |
| E78 | Disorders Of Lipoprotein Metabolism And Other Lipidaemias | 5-10  | AD | 1.48 | 1.29 | 1.70 | 3.33E-08 | 212  | 8983  | 3.33E-07 |
| E78 | Disorders Of Lipoprotein Metabolism And Other Lipidaemias | 10-15 | AD | 1.44 | 1.27 | 1.63 | 4.43E-09 | 288  | 12012 | 2.66E-08 |
| E78 | Disorders Of Lipoprotein Metabolism And Other Lipidaemias | All   | AD | 1.18 | 1.09 | 1.27 | 1.53E-05 | 1090 | 53797 | 2.56E-05 |
| E83 | Disorders Of Mineral Metabolism                           | 1-5   | AD | 1.64 | 1.22 | 2.21 | 9.34E-04 | 45   | 1522  | 2.08E-03 |
| E83 | Disorders Of Mineral Metabolism                           | All   | AD | 1.32 | 1.08 | 1.62 | 7.75E-03 | 94   | 4435  | 8.16E-03 |
| E85 | Amyloidosis                                               | 1-5   | AD | 3.59 | 1.61 | 8.00 | 1.75E-03 | 6    | 81    | 3.50E-03 |
| E85 | Amyloidosis                                               | All   | AD | 2.57 | 1.34 | 4.94 | 4.72E-03 | 9    | 182   | 5.55E-03 |
| E86 | Volume Depletion                                          | 1-5   | AD | 1.90 | 1.48 | 2.44 | 5.01E-07 | 63   | 1678  | 2.50E-06 |
| E86 | Volume Depletion                                          | 5-10  | AD | 1.89 | 1.32 | 2.71 | 5.28E-04 | 30   | 795   | 1.56E-03 |
| E86 | Volume Depletion                                          | 10-15 | AD | 2.09 | 1.28 | 3.41 | 3.30E-03 | 16   | 374   | 9.91E-03 |
| E86 | Volume                                                    | All   | AD | 1.78 | 1.52 | 2.10 | 3.26E-12 | 153  | 4911  | 1.63E-11 |

|     |                                                             |       |    |      |      |      |          |     |       |          |
|-----|-------------------------------------------------------------|-------|----|------|------|------|----------|-----|-------|----------|
|     | Depletion                                                   |       |    |      |      |      |          |     |       |          |
| E87 | Other Disorders Of Fluid, Electrolyte And Acid-Base Balance | 1-5   | AD | 1.52 | 1.27 | 1.81 | 3.99E-06 | 128 | 4059  | 1.14E-05 |
| E87 | Other Disorders Of Fluid, Electrolyte And Acid-Base Balance | 5-10  | AD | 1.72 | 1.37 | 2.16 | 3.78E-06 | 75  | 1965  | 1.51E-05 |
| E87 | Other Disorders Of Fluid, Electrolyte And Acid-Base Balance | 10-15 | AD | 1.92 | 1.34 | 2.75 | 3.70E-04 | 30  | 786   | 1.33E-03 |
| E87 | Other Disorders Of Fluid, Electrolyte And Acid-Base Balance | All   | AD | 1.51 | 1.34 | 1.70 | 6.43E-12 | 312 | 11313 | 2.57E-11 |
| K04 | Diseases Of Pulp And Periapical Tissues                     | 1-5   | AD | 2.41 | 1.20 | 4.82 | 1.31E-02 | 8   | 305   | 1.87E-02 |
| K04 | Diseases Of Pulp And Periapical Tissues                     | All   | AD | 1.44 | 1.11 | 1.87 | 6.21E-03 | 57  | 3365  | 6.90E-03 |
| K20 | Oesophagitis                                                | 1-5   | AD | 1.62 | 1.16 | 2.28 | 4.88E-03 | 34  | 1399  | 8.14E-03 |
| K20 | Oesophagitis                                                | 5-10  | AD | 1.51 | 1.15 | 1.99 | 3.18E-03 | 52  | 2290  | 7.06E-03 |
| K20 | Oesophagitis                                                | All   | AD | 1.28 | 1.10 | 1.49 | 1.63E-03 | 175 | 8660  | 2.03E-03 |
| K29 | Gastritis And Duodenitis                                    | 5-10  | AD | 1.32 | 1.13 | 1.55 | 5.47E-04 | 160 | 7742  | 1.56E-03 |
| K29 | Gastritis And                                               | 10-15 | AD | 1.31 | 1.09 | 1.57 | 3.89E-03 | 120 | 5837  | 1.00E-02 |

|     |                                                  |       |    |      |      |      |          |     |       |          |
|-----|--------------------------------------------------|-------|----|------|------|------|----------|-----|-------|----------|
|     | Duodenitis                                       |       |    |      |      |      |          |     |       |          |
| K29 | Gastritis And Duodenitis                         | All   | AD | 1.20 | 1.09 | 1.32 | 1.45E-04 | 523 | 27914 | 2.23E-04 |
| K52 | Other Non-Infective Gastro-Enteritis And Colitis | 5-10  | AD | 2.31 | 1.82 | 2.93 | 6.20E-12 | 69  | 2086  | 1.24E-10 |
| K52 | Other Non-Infective Gastro-Enteritis And Colitis | 10-15 | AD | 1.36 | 1.08 | 1.70 | 7.92E-03 | 77  | 3697  | 1.43E-02 |
| K52 | Other Non-Infective Gastro-Enteritis And Colitis | All   | AD | 1.37 | 1.20 | 1.56 | 1.75E-06 | 250 | 12984 | 3.50E-06 |
| K59 | Other Functional Intestinal Disorders            | 1-5   | AD | 1.55 | 1.30 | 1.85 | 1.27E-06 | 127 | 4476  | 4.22E-06 |
| K59 | Other Functional Intestinal Disorders            | 5-10  | AD | 1.70 | 1.40 | 2.07 | 8.75E-08 | 105 | 3464  | 5.83E-07 |
| K59 | Other Functional Intestinal Disorders            | 10-15 | AD | 1.41 | 1.10 | 1.82 | 7.32E-03 | 61  | 2512  | 1.43E-02 |
| K59 | Other Functional Intestinal Disorders            | All   | AD | 1.55 | 1.40 | 1.73 | 3.55E-16 | 394 | 15596 | 3.55E-15 |
| K64 | Haemorrhoids And Perianal Venous Thrombosis      | 1-5   | AD | 0.41 | 0.29 | 0.58 | 2.60E-07 | 34  | 5880  | 1.73E-06 |
| K64 | Haemorrhoids                                     | All   | AD | 0.69 | 0.59 | 0.80 | 6.94E-07 | 186 | 20162 | 1.54E-06 |

|     |                                |     |    |      |      |      |          |    |      |          |
|-----|--------------------------------|-----|----|------|------|------|----------|----|------|----------|
|     | And Perianal Venous Thrombosis |     |    |      |      |      |          |    |      |          |
| K66 | Other Disorders Of Peritoneum  | 1-5 | AD | 0.49 | 0.28 | 0.86 | 1.28E-02 | 12 | 1668 | 1.87E-02 |
| K66 | Other Disorders Of Peritoneum  | All | AD | 0.59 | 0.44 | 0.81 | 8.77E-04 | 41 | 4636 | 1.17E-03 |

374  
375  
376  
377  
378  
379  
380  
381  
382  
383  
384

**Table 3. Time-Stratified Cox Regression model for Alzheimer’s Disease.** ICD10\_code: initial diagnosis of endocrine, metabolic, digestive system, and nutritional disorders. ICD10\_diagnosis\_range: Number of years from the initial diagnosis of endocrine, metabolic, digestive system, and nutritional disorders (ICD-10 code) to the occurrence of neurodegenerative disease outcome. ci\_min: Confidence interval minimum. ci\_max: Confidence interval maximum. P\_VAL: p-value. N\_pairs: Number of individuals identified with both ICD-10 code and neurodegenerative disease outcome. n: Number of individuals identified with ICD10\_code. P\_VAL\_FDR\_CORRECTED: p-value after False Discovery Rate corrected.



385  
386

| ICD10_code | ICD10_code_description                  | ICD10_diagnosis_range | Neurodegenerative disease outcome | Hazard Ratio | ci_min | ci_max | P_VAL    | N_pairs | n     | P_VAL_FDR_CORRECTED |
|------------|-----------------------------------------|-----------------------|-----------------------------------|--------------|--------|--------|----------|---------|-------|---------------------|
| E10        | insulin-dependent diabetes mellitus     | 5-10                  | PD                                | 3.08         | 1.89   | 5.04   | 7.15E-06 | 16      | 396   | 4.29E-05            |
| E10        | insulin-dependent diabetes mellitus     | 10-15                 | PD                                | 2.53         | 1.36   | 4.71   | 3.39E-03 | 10      | 310   | 1.02E-02            |
| E10        | insulin-dependent diabetes mellitus     | All                   | PD                                | 2.65         | 2.02   | 3.48   | 2.44E-12 | 53      | 1608  | 1.46E-11            |
| E11        | non-insulin-dependent diabetes mellitus | 5-10                  | PD                                | 1.41         | 1.16   | 1.70   | 4.19E-04 | 112     | 5480  | 8.38E-04            |
| E11        | non-insulin-dependent diabetes mellitus | 10-15                 | PD                                | 1.40         | 1.13   | 1.74   | 2.03E-03 | 86      | 3976  | 8.10E-03            |
| E11        | non-insulin-dependent diabetes mellitus | All                   | PD                                | 1.21         | 1.08   | 1.36   | 1.36E-03 | 330     | 18815 | 1.63E-03            |
| E14        | unspecified diabetes mellitus           | 1-5                   | PD                                | 1.94         | 1.17   | 3.22   | 1.06E-02 | 15      | 623   | 1.58E-02            |
| E14        | unspecified diabetes mellitus           | 5-10                  | PD                                | 2.66         | 1.76   | 4.01   | 3.04E-06 | 23      | 832   | 3.65E-05            |
| E14        | unspecified diabetes mellitus           | 10-15                 | PD                                | 1.94         | 1.45   | 2.60   | 8.17E-06 | 46      | 1790  | 9.80E-05            |
| E14        | unspecified diabetes mellitus           | All                   | PD                                | 1.61         | 1.39   | 1.86   | 1.81E-10 | 197     | 8658  | 5.44E-10            |
| E16        | other disorders of pancreatic internal  | 1-5                   | PD                                | 1.89         | 1.04   | 3.42   | 3.54E-02 | 11      | 358   | 4.73E-02            |

|     |                                                  |       |    |      |      |      |          |     |       |          |
|-----|--------------------------------------------------|-------|----|------|------|------|----------|-----|-------|----------|
|     | secretion                                        |       |    |      |      |      |          |     |       |          |
| E16 | other disorders of pancreatic internal secretion | 5-10  | PD | 1.94 | 1.17 | 3.22 | 1.06E-02 | 15  | 520   | 1.81E-02 |
| E16 | other disorders of pancreatic internal secretion | All   | PD | 1.84 | 1.36 | 2.47 | 6.76E-05 | 44  | 1602  | 1.16E-04 |
| E53 | deficiency of other b group vitamins             | 1-5   | PD | 2.04 | 1.34 | 3.10 | 8.81E-04 | 22  | 688   | 2.64E-03 |
| E53 | deficiency of other b group vitamins             | All   | PD | 1.72 | 1.30 | 2.29 | 1.88E-04 | 48  | 1907  | 2.81E-04 |
| E66 | obesity                                          | 1-5   | PD | 0.63 | 0.47 | 0.83 | 1.45E-03 | 47  | 6561  | 2.95E-03 |
| E66 | obesity                                          | All   | PD | 0.82 | 0.71 | 0.94 | 5.86E-03 | 211 | 22453 | 5.86E-03 |
| K30 | dyspepsia                                        | 5-10  | PD | 1.84 | 1.39 | 2.44 | 1.90E-05 | 50  | 2480  | 7.61E-05 |
| K30 | dyspepsia                                        | All   | PD | 1.34 | 1.13 | 1.60 | 8.51E-04 | 135 | 8811  | 1.13E-03 |
| K57 | diverticular disease of intestine                | 1-5   | PD | 0.60 | 0.48 | 0.75 | 8.54E-06 | 77  | 10132 | 5.12E-05 |
| K57 | diverticular disease of intestine                | 5-10  | PD | 0.68 | 0.56 | 0.83 | 1.19E-04 | 104 | 10867 | 2.85E-04 |
| K57 | diverticular disease of intestine                | All   | PD | 0.69 | 0.62 | 0.77 | 6.24E-11 | 354 | 34801 | 2.50E-10 |
| K59 | other functional intestinal disorders            | 1-5   | PD | 1.51 | 1.23 | 1.86 | 8.27E-05 | 94  | 4443  | 3.31E-04 |
| K59 | other functional intestinal disorders            | 5-10  | PD | 1.62 | 1.29 | 2.03 | 3.70E-05 | 76  | 3435  | 1.11E-04 |
| K59 | other functional                                 | 10-15 | PD | 1.61 | 1.22 | 2.12 | 7.90E-04 | 51  | 2502  | 4.74E-03 |

|     |                                             |       |    |      |      |      |          |     |       |          |
|-----|---------------------------------------------|-------|----|------|------|------|----------|-----|-------|----------|
|     | l intestinal disorders                      |       |    |      |      |      |          |     |       |          |
| K59 | other functional intestinal disorders       | All   | PD | 1.56 | 1.38 | 1.76 | 4.81E-13 | 301 | 15431 | 5.77E-12 |
| K63 | other diseases of intestine                 | 1-5   | PD | 0.61 | 0.45 | 0.83 | 1.47E-03 | 42  | 5726  | 2.95E-03 |
| K63 | other diseases of intestine                 | 5-10  | PD | 0.74 | 0.57 | 0.95 | 1.67E-02 | 62  | 6182  | 2.23E-02 |
| K63 | other diseases of intestine                 | 10-15 | PD | 0.70 | 0.52 | 0.94 | 1.84E-02 | 44  | 4008  | 4.40E-02 |
| K63 | other diseases of intestine                 | All   | PD | 0.69 | 0.59 | 0.80 | 1.34E-06 | 183 | 19139 | 2.69E-06 |
| K64 | haemorrhoids and perianal venous thrombosis | 1-5   | PD | 0.39 | 0.27 | 0.57 | 1.01E-06 | 27  | 5873  | 1.22E-05 |
| K64 | haemorrhoids and perianal venous thrombosis | 5-10  | PD | 0.66 | 0.47 | 0.92 | 1.55E-02 | 34  | 4640  | 2.23E-02 |
| K64 | haemorrhoids and perianal venous thrombosis | All   | PD | 0.59 | 0.50 | 0.71 | 3.62E-09 | 136 | 20006 | 8.69E-09 |
| K66 | other disorders of peritoneum               | 1-5   | PD | 0.34 | 0.16 | 0.72 | 4.79E-03 | 7   | 1663  | 8.21E-03 |
| K66 | other disorders of peritoneum               | All   | PD | 0.63 | 0.45 | 0.87 | 5.81E-03 | 35  | 4612  | 5.86E-03 |

**Table 4. Time-Stratified Cox Regression model for Parkinson’s Disease. ICD10\_code:**  
initial diagnosis of endocrine, metabolic, digestive system, and nutritional

387  
388  
389

390 disorders. ICD10\_diagnosis\_range: Number of years from the initial diagnosis of  
391 endocrine, metabolic, digestive system, and nutritional disorders (ICD-10 code) to  
392 the occurrence of neurodegenerative disease outcome. ci\_min: Confidence interval  
393 minimum. ci\_max: Confidence interval maximum. P\_VAL: p-value. N\_pairs:  
394 Number of individuals identified with both ICD-10 code and neurodegenerative  
395 disease outcome. n: Number of individuals identified with ICD10\_code.  
396 P\_VAL\_FDR\_CORRECTED: p-value after False Discovery Rate corrected.  
397

398  
399

| Olink_<br>marker_<br>_being_<br>compar<br>ed | Olink_<br>marker_<br>_definit<br>ion                    | ICD10_<br>Code | ICD10_<br>Code_d<br>efinitio<br>n                         | Averag<br>e<br>Olink_<br>marker<br>level in<br>individ<br>uals<br>diagnos<br>ed with<br>both<br>AD and<br>ICD-10<br>code<br>(AD +<br>ICD-10) | Averag<br>e<br>Olink_<br>marker<br>level in<br>individ<br>uals<br>diagnos<br>ed with<br>only AD<br>(AD) | T-<br>Statistic<br>(AD +<br>ICD-10<br>vs. AD) | Degrees<br>of<br>Freedo<br>m | AD_size | AD_IC<br>D10_siz<br>e | P-Value      | P_VAL<br>_FDR_<br>CORR<br>ECTED |
|----------------------------------------------|---------------------------------------------------------|----------------|-----------------------------------------------------------|----------------------------------------------------------------------------------------------------------------------------------------------|---------------------------------------------------------------------------------------------------------|-----------------------------------------------|------------------------------|---------|-----------------------|--------------|---------------------------------|
| gfap                                         | Glial<br>fibrillar<br>y acidic<br>protein               | p130708        | Non-<br>Insulin-<br>Depend<br>ent<br>Diabetes<br>Mellitus | 0.735                                                                                                                                        | 0.45                                                                                                    | -4.05                                         | 544                          | 437     | 109                   | 8.20E-<br>05 | 1.45E-<br>03                    |
| gfap                                         | Glial<br>fibrillar<br>y acidic<br>protein               | p131598        | Gastritis<br>And<br>Duodeni<br>tis                        | 0.722                                                                                                                                        | 0.50                                                                                                    | -3.46                                         | 544                          | 439     | 107                   | 6.74E-<br>04 | 8.42E-<br>03                    |
| gfap                                         | Glial<br>fibrillar<br>y acidic<br>protein               | p130714        | Unspeci<br>fied<br>Diabetes<br>Mellitus                   | 0.713                                                                                                                                        | 0.42                                                                                                    | -3.31                                         | 544                          | 482     | 64                    | 1.43E-<br>03 | 1.47E-<br>02                    |
| adgrg1                                       | Adhesio<br>n G-<br>protein<br>coupled<br>receptor<br>G1 | p130792        | Obesity                                                   | 0.485                                                                                                                                        | 1.39                                                                                                    | 4.80                                          | 556                          | 497     | 61                    | 9.17E-<br>06 | 2.29E-<br>04                    |
| adgrg1                                       | Adhesio<br>n G-<br>protein<br>coupled<br>receptor<br>G1 | p130714        | Unspeci<br>fied<br>Diabetes<br>Mellitus                   | 0.455                                                                                                                                        | 1.52                                                                                                    | 6.12                                          | 556                          | 491     | 67                    | 4.08E-<br>08 | 1.75E-<br>06                    |
| adgrg1                                       | Adhesio<br>n G-<br>protein<br>coupled<br>receptor<br>G1 | p130708        | Non-<br>Insulin-<br>Depend<br>ent<br>Diabetes<br>Mellitus | 0.393                                                                                                                                        | 1.35                                                                                                    | 7.21                                          | 556                          | 447     | 111                   | 3.60E-<br>11 | 5.40E-<br>09                    |
| calb1                                        | Calbindi<br>n                                           | p131582        | Oesopha<br>gitis                                          | 0.162                                                                                                                                        | 0.41                                                                                                    | 2.96                                          | 556                          | 520     | 38                    | 5.05E-<br>03 | 4.10E-<br>02                    |
| calb1                                        | Calbindi<br>n                                           | p130718        | Other<br>Disorder<br>s Of<br>Pancreat<br>ic               | 0.167                                                                                                                                        | 0.38                                                                                                    | 3.07                                          | 556                          | 527     | 31                    | 4.06E-<br>03 | 3.48E-<br>02                    |



|       |           |         |                                                             |       |      |       |     |     |     |          |          |
|-------|-----------|---------|-------------------------------------------------------------|-------|------|-------|-----|-----|-----|----------|----------|
|       |           |         | Internal Secretion                                          |       |      |       |     |     |     |          |          |
| calb1 | Calbindin | p130824 | Amyloidosis                                                 | 0.177 | 0.55 | 12.23 | 556 | 556 | 2   | 1.86E-03 | 1.80E-02 |
| dcn   | Decorin   | p130828 | Other Disorders Of Fluid, Electrolyte And Acid-Base Balance | 0.118 | 0.20 | 2.86  | 552 | 418 | 136 | 4.68E-03 | 3.90E-02 |
| dcn   | Decorin   | p130826 | Volume Depletion                                            | 0.119 | 0.21 | 3.05  | 552 | 442 | 112 | 2.71E-03 | 2.54E-02 |
| ren   | Renin     | p130826 | Volume Depletion                                            | 0.340 | 0.67 | 2.77  | 559 | 445 | 116 | 6.23E-03 | 4.67E-02 |
| ren   | Renin     | p130770 | Deficiency Of Other B Group Vitamins                        | 0.367 | 1.01 | 3.41  | 559 | 524 | 37  | 1.46E-03 | 1.47E-02 |
| ren   | Renin     | p130792 | Obesity                                                     | 0.349 | 0.89 | 3.71  | 559 | 499 | 62  | 3.89E-04 | 5.07E-03 |
| ren   | Renin     | p131640 | Other Functional Intestinal Disorders                       | 0.310 | 0.70 | 3.76  | 559 | 420 | 141 | 2.17E-04 | 3.25E-03 |
| ren   | Renin     | p130706 | Insulin-Dependent Diabetes Mellitus                         | 0.369 | 1.62 | 3.78  | 559 | 543 | 18  | 1.43E-03 | 1.47E-02 |
| ren   | Renin     | p130718 | Other Disorders Of Pancreatic Internal Secretion            | 0.349 | 1.46 | 4.30  | 559 | 531 | 30  | 1.60E-04 | 2.67E-03 |
| ren   | Renin     | p130714 | Unspecified Diabetes Mellitus                               | 0.293 | 1.25 | 5.73  | 559 | 493 | 68  | 1.86E-07 | 6.97E-06 |
| ren   | Renin     | p130708 | Non-Insulin-Dependent                                       | 0.253 | 1.02 | 5.97  | 559 | 447 | 114 | 1.74E-08 | 8.71E-07 |

|       |                                  |         |                                                             |       |      |      |     |     |     |          |          |
|-------|----------------------------------|---------|-------------------------------------------------------------|-------|------|------|-----|-----|-----|----------|----------|
|       |                                  |         | Diabetes Mellitus                                           |       |      |      |     |     |     |          |          |
| ren   | Renin                            | p130814 | Disorders Of Lipoprotein Metabolism And Other Lipidemia     | 0.161 | 0.69 | 6.02 | 559 | 296 | 265 | 3.38E-09 | 2.54E-07 |
| gdf15 | Growth/differentiation factor 15 | p131582 | Oesophagitis                                                | 0.415 | 0.82 | 3.12 | 568 | 530 | 40  | 3.32E-03 | 3.01E-02 |
| gdf15 | Growth/differentiation factor 15 | p130826 | Volume Depletion                                            | 0.399 | 0.62 | 3.28 | 568 | 453 | 117 | 1.26E-03 | 1.45E-02 |
| gdf15 | Growth/differentiation factor 15 | p130820 | Disorders Of Mineral Metabolism                             | 0.418 | 0.83 | 3.89 | 568 | 535 | 35  | 3.85E-04 | 5.07E-03 |
| gdf15 | Growth/differentiation factor 15 | p130828 | Other Disorders Of Fluid, Electrolyte And Acid-Base Balance | 0.382 | 0.63 | 4.26 | 568 | 431 | 139 | 3.03E-05 | 6.49E-04 |
| gdf15 | Growth/differentiation factor 15 | p130706 | Insulin-Dependent Diabetes Mellitus                         | 0.418 | 1.22 | 4.47 | 568 | 552 | 18  | 3.12E-04 | 4.46E-03 |
| gdf15 | Growth/differentiation factor 15 | p130792 | Obesity                                                     | 0.400 | 0.80 | 4.48 | 568 | 508 | 62  | 2.76E-05 | 6.36E-04 |
| gdf15 | Growth/differentiation factor 15 | p130814 | Disorders Of Lipoprotein Metabolism And Other Lipidemia     | 0.338 | 0.56 | 4.68 | 568 | 302 | 268 | 3.64E-06 | 1.21E-04 |
| gdf15 | Growth/differentiation factor 15 | p130718 | Other Disorder                                              | 0.409 | 1.06 | 4.82 | 568 | 540 | 30  | 3.68E-05 | 7.36E-04 |

|       |                                                    |         |                                          |       |      |      |     |     |     |          |          |
|-------|----------------------------------------------------|---------|------------------------------------------|-------|------|------|-----|-----|-----|----------|----------|
|       | iation factor 15                                   |         | s Of Pancreat ic Internal Secretio n     |       |      |      |     |     |     |          |          |
| gdf15 | Growth/different iation factor 15                  | p130708 | Non-Insulin-Depend ent Diabetes Mellitus | 0.336 | 0.87 | 7.47 | 568 | 455 | 115 | 7.97E-12 | 2.39E-09 |
| gdf15 | Growth/different iation factor 15                  | p130714 | Unspeci fied Diabetes Mellitus           | 0.359 | 1.06 | 7.51 | 568 | 501 | 69  | 9.20E-11 | 9.20E-09 |
| igf2r | Cation-indepen dent mannos e-6-phospha te receptor | p130714 | Unspeci fied Diabetes Mellitus           | 0.065 | 0.17 | 3.39 | 558 | 492 | 68  | 1.04E-03 | 1.24E-02 |
| igf2r | Cation-indepen dent mannos e-6-phospha te receptor | p130792 | Obesity                                  | 0.064 | 0.19 | 3.94 | 558 | 498 | 62  | 1.74E-04 | 2.74E-03 |
| igf2r | Cation-indepen dent mannos e-6-phospha te receptor | p130708 | Non-Insulin-Depend ent Diabetes Mellitus | 0.053 | 0.17 | 4.75 | 558 | 446 | 114 | 4.15E-06 | 1.24E-04 |
| il1r1 | Interleu kin-1 receptor type 1                     | p130706 | Insulin-Depend ent Diabetes Mellitus     | 0.051 | 0.30 | 3.75 | 556 | 540 | 18  | 1.47E-03 | 1.47E-02 |
| il1r1 | Interleu kin-1 receptor type 1                     | p130714 | Unspeci fied Diabetes Mellitus           | 0.039 | 0.20 | 4.77 | 556 | 491 | 67  | 7.80E-06 | 2.13E-04 |
| il1r1 | Interleu kin-1 receptor type 1                     | p130708 | Non-Insulin-Depend ent Diabetes Mellitus | 0.027 | 0.18 | 5.99 | 556 | 444 | 114 | 1.17E-08 | 7.01E-07 |

|        |                                                          |         |                                                             |       |      |      |     |     |     |          |          |
|--------|----------------------------------------------------------|---------|-------------------------------------------------------------|-------|------|------|-----|-----|-----|----------|----------|
| il1rl1 | Interleukin-1 receptor-like 1                            | p130708 | Non-Insulin-Dependent Diabetes Mellitus                     | 0.109 | 0.26 | 2.80 | 566 | 454 | 114 | 5.67E-03 | 4.48E-02 |
| il1rl1 | Interleukin-1 receptor-like 1                            | p130714 | Unspecified Diabetes Mellitus                               | 0.115 | 0.31 | 2.81 | 566 | 500 | 68  | 6.14E-03 | 4.67E-02 |
| il1rl1 | Interleukin-1 receptor-like 1                            | p130718 | Other Disorders Of Pancreatic Internal Secretion            | 0.121 | 0.46 | 3.12 | 566 | 538 | 30  | 3.82E-03 | 3.37E-02 |
| ltbp2  | Latent-transforming growth factor beta-binding protein 2 | p130828 | Other Disorders Of Fluid, Electrolyte And Acid-Base Balance | 0.243 | 0.39 | 4.08 | 568 | 431 | 139 | 6.02E-05 | 1.13E-03 |

**Table 5. Proteomic biomarker comparison in isolated Alzheimer’s Disease (AD) cases vs. cases with digestive, endocrine, metabolic, and nutritional conditions.**  
P\_VAL\_FDR\_CORRECTED: p-value after False Discovery Rate (FDR) corrected.

000  
001  
002  
003  
004  
005

006  
007

| Olink_<br>marker_<br>_being_<br>compar<br>ed     | Olink_<br>marker_<br>_definit<br>ion | ICD10_<br>Code | ICD10_<br>Code_d<br>efinitio<br>n                         | Averag<br>e<br>Olink_<br>marker_<br>level in<br>individ<br>uals<br>diagnos<br>ed with<br>both PD<br>and<br>ICD-10<br>code<br>(PD +<br>ICD-10) | Averag<br>e<br>Olink_<br>marker_<br>level in<br>individ<br>uals<br>diagnos<br>ed with<br>only PD<br>(PD) | T-<br>Statistic<br>(PD +<br>ICD-10<br>vs. PD) | Degrees<br>of<br>Freedo<br>m | AD_size | AD_IC<br>D10_siz<br>e | P-Value      | P_VAL<br>_FDR_<br>CORR<br>ECTED |
|--------------------------------------------------|--------------------------------------|----------------|-----------------------------------------------------------|-----------------------------------------------------------------------------------------------------------------------------------------------|----------------------------------------------------------------------------------------------------------|-----------------------------------------------|------------------------------|---------|-----------------------|--------------|---------------------------------|
| Collage<br>nase 3                                | mmp13                                | p131600        | dyspepsi<br>a                                             | 0.04                                                                                                                                          | 0.23                                                                                                     | 3.28                                          | 603                          | 569     | 36                    | 2.08E-<br>03 | 4.97E-<br>02                    |
| Peroxi<br>redoxin-1                              | prdx1                                | p130706        | insulin-<br>depende<br>nt<br>diabetes<br>mellitus         | 0.22                                                                                                                                          | -0.43                                                                                                    | -3.60                                         | 603                          | 589     | 16                    | 2.13E-<br>03 | 4.97E-<br>02                    |
| CD276<br>antigen                                 | cd276                                | p130708        | non-<br>insulin-<br>depende<br>nt<br>diabetes<br>mellitus | 0.08                                                                                                                                          | 0.23                                                                                                     | 3.38                                          | 623                          | 523     | 102                   | 9.29E-<br>04 | 4.33E-<br>02                    |
| CD276<br>antigen                                 | cd276                                | p130714        | unspecif<br>ied<br>diabetes<br>mellitus                   | 0.09                                                                                                                                          | 0.33                                                                                                     | 3.40                                          | 623                          | 569     | 56                    | 1.20E-<br>03 | 4.33E-<br>02                    |
| CD276<br>antigen                                 | cd276                                | p130706        | insulin-<br>depende<br>nt<br>diabetes<br>mellitus         | 0.09                                                                                                                                          | 0.70                                                                                                     | 4.38                                          | 623                          | 609     | 16                    | 5.06E-<br>04 | 3.64E-<br>02                    |
| Interleu<br>kin-1<br>receptor<br>-like 1         | ill1r1l                              | p130714        | unspecif<br>ied<br>diabetes<br>mellitus                   | 0.13                                                                                                                                          | 0.39                                                                                                     | 3.92                                          | 631                          | 575     | 58                    | 1.99E-<br>04 | 2.87E-<br>02                    |
| Neural<br>cell<br>adhesio<br>n<br>molecul<br>e 1 | ncam1                                | p130792        | obesity                                                   | 0.13                                                                                                                                          | -0.03                                                                                                    | -3.12                                         | 628                          | 550     | 80                    | 2.42E-<br>03 | 4.97E-<br>02                    |

008  
009  
010  
011  
012  
013

**Table 6. Proteomic biomarker comparison in isolated Parkinson’s Disease (PD) cases vs. cases with digestive, endocrine, metabolic, and nutritional conditions.**  
P\_VAL\_FDR\_CORRECTED: p-value after False Discovery Rate (FDR) corrected.
